# Supplementary material
Source: PubMed Central journal article supplement (PMC2526162)

# Vinyldiazolactone as a Vinylcarbene Precursor: Highly Selective C-H Insertion and Cyclopropanation Reaction

Darren Bykowski, Kou-Hui Wu, and Michael P. Doyle\*

*Department of Chemistry, University of Maryland, College Park, Maryland*

## Supporting Information

| <b>Table of Contents</b>                                             | <b>Page</b> |
|----------------------------------------------------------------------|-------------|
| General Information                                                  | S2          |
| Preparation of <b>1</b>                                              | S2          |
| Table 1 Experimental                                                 | S2          |
| Table 2 Experimental                                                 | S3          |
| Synthesis of <b>4</b>                                                | S4          |
| Determination of Absolute Stereochemistry of <b>2a</b>               | S5          |
| Determination of Relative Stereochemistries of <b>2b</b> , <b>3a</b> | S6          |
| <sup>1</sup> H NMR Spectra                                           | S8          |
| <sup>13</sup> C NMR Spectra                                          | S17         |
| HSQC Spectrum of <b>2b</b>                                           | S26         |

**General Information:** NMR spectra were recorded on a Bruker DRX-400 MHz instrument in a solution of deuteriochloroform unless otherwise noted. Chemical shifts of  $^1\text{H}$  NMR are quoted relative to internal  $\text{Me}_4\text{Si}$  (0.00 ppm), those of  $^{13}\text{C}$  NMR are quoted relative to residual solvent (77.0 ppm). NMR spectra of **1** were obtained using deuterated dichloromethane, chemical shifts of the  $^1\text{H}$  NMR are quoted relative to residual solvent (5.32 ppm), chemical shifts of the  $^{13}\text{C}$  are quoted relative to residual solvent (54.0 ppm). High-resolution spectra were obtained on a JEOL SX102a spectrometer. Thin layer chromatography was performed on Merck Silica Gel 40 F<sub>254</sub> glass backed plates, visualization was achieved with UV or  $\text{KMnO}_4$  stain. Column chromatography was performed on 40-63  $\mu\text{m}$ , 230-400 mesh, 60 A silica gel. Cyclopropanation substrates 1-vinylcyclohexene,<sup>1</sup> 1-phenylbutadiene,<sup>2</sup> 1-phenyl-3-methylbutadiene were prepared according to literature procedures, all other reagents were purchased from Aldrich. Anhydrous dichloromethane and tetrahydrofuran were obtained by dried by nitrogen forced-flow over activated alumina as described by Grubbs.<sup>3</sup>

**Preparation of 1:** A solution of 3,5-dihydro-pyran-2-one (400 mg, 4.10 mmol) in acetonitrile (40 mL) was stirred at 0 °C. 4-Acetamidobenzenesulfonyl azide (1.23 g, 5.10 mmol) and DBU (0.77 mL, 5.1 mmol) were added to the stirred solution. After 3h, the resulting brown mixture was evaporated to a thick oil. The mixture was purified *via* flash silica gel chromatography (2:1 hexanes/ethyl acetate,  $R_f = 0.47$ ), eluting **1** as a bright yellow band. Fractions were evaporated and dried under vacuum to yield **1** as an orange solid (237 mg, 47%): mp 60 °C;  $^1\text{H}$  NMR (400 MHz,  $\text{CD}_2\text{Cl}_2$ )  $\delta$  6.20 (dt,  $J = 10.0, 1.8$  Hz, 1H), 5.38 (td,  $J = 3.3, 10.0$  Hz, 1H), 4.99 (dd,  $J = 3.3, 1.8$  Hz, 2H);  $^{13}\text{C}$  NMR (100 MHz,  $\text{CD}_2\text{Cl}_2$ )  $\delta$  164.5, 114.5, 113.5, 70.5 (C = N<sub>2</sub> missing); IR (neat) 3073, 2882, 2098, 1668  $\text{cm}^{-1}$ ; HRMS (EI) calcd for  $\text{C}_5\text{H}_4\text{N}_2\text{O}_2$  124.0273, found 124.0275 (M+).

**General Procedure for Table 1:** To a flame dried flask containing anhydrous dichloromethane (20 mL), dirhodium catalyst (.013 mmol), and 1,4-cyclohexadiene (0.61 mL, 6.5 mmol) were added. The apparatus was degassed and heated to reflux under nitrogen. A solution of **1** (160 mg, 1.29 mmol in 10 mL dichloromethane) was added over 8 h. Upon completion of addition, the reaction mixture was refluxed for an additional 1h, then filtered through a short silica gel plug to remove the dirhodium catalyst. Integration of diagnostic  $^1\text{H}$  NMR signals of **2a** (4.80 ppm) and **2b** (4.98 ppm) were used to determine relative ratios of **2a,b**. GC was used to determine the enantiomeric excess of **2a** prior to column chromatographic purification. Silica gel column chromatography (3:1 hexanes/ethyl acetate  $R_f = 0.40$ ) of the reaction mixture provided an unseparated mixture of **2a,b** from which isolated yields were calculated from the mass of the product. Pure samples of **2a** and **2b** were obtained by subsequent silica gel chromatography (10:1 hexane/ethyl acetate), but only partial separation was achieved.

**2a (from Table 1, entry 6):** Clear oil, GC: Chiraldex G-TA (30m x 0.25 mm), 140 °C/10 min, 1 °C/min ramp to 160 °C), retention times 26.2 min (*R*) and 29.2 min (*S*), 80% ee *R*;  $[\alpha]_D^{21} +79.5^\circ$  ( $c = 0.31$ ,  $\text{CHCl}_3$ ).  $^1\text{H}$  NMR (400 MHz,  $\text{CDCl}_3$ )  $\delta$  5.97-5.76 (comp, 4H),

<sup>1</sup> Herz, W.; Juo, R.-R. *J. Org. Chem.* **1985**, *50*, 618.

<sup>2</sup> Okamoto, T.; Kobayashi, K.; Oka, S.; Tanimoto, S. *J. Org. Chem.* **1988**, *53*, 4897.

<sup>3</sup> Pangborn, A. B.; Giardello, M. A.; Grubbs, R. H.; Rosen, R. K.; Timmers, F. J. *Organometallics* **1996**, *15*, 1518.

5.65-5.50 (comp, 2H), 4.83-4.78 (comp, 2H), 3.62-3.55 (m, 1H), 3.09-3.04 (m, 1H), 2.64-2.58 (comp, 2H);  $^{13}\text{C}$  NMR (100 MHz,  $\text{CDCl}_3$ ) 170.6, 127.5, 127.1, 125.87, 123.9, 124.0, 122.9, 68.8, 44.4, 38.1, 26.2; IR (neat) 3018, 1733  $\text{cm}^{-1}$ ; HRMS (EI) calcd for  $\text{C}_{11}\text{H}_{12}\text{O}_2$  176.0837, found 176.0835 ( $\text{M}^+$ ).

**2b (from Table 1, entry 2):** Clear oil,  $^1\text{H}$  NMR (400 MHz,  $\text{CDCl}_3$ )  $\delta$  5.95 (dt,  $J = 10.5$ , 2.9 Hz, 1H), 5.63 (m, 2H), 5.42 (dt,  $J = 10.5$ , 1.9 Hz, 1H), 4.98 (dd,  $J = 2.9$ , 1.9 Hz, 2H), 2.54-2.42 (comp, 2H), 2.19-2.16 (m, 2H), 2.09-2.01 (m 2H);  $^{13}\text{C}$  NMR (100 MHz,  $\text{CDCl}_3$ )  $\delta$  172.5, 124.2, 122.9, 121.1, 68.5, 28.0, 26.1, 19.6; IR (neat) 2088, 1712  $\text{cm}^{-1}$ ; HRMS (EI) calcd for  $\text{C}_{11}\text{H}_{12}\text{O}_2$  176.0837, found 176.0837 ( $\text{M}^+$ ).

**General Procedure for Table 2:** To a flame dried flask containing anhydrous dichloromethane (20 mL),  $\text{Rh}_2(\text{S,R-MenthAZ})_4$  (17 mg, 0.013 mmol) and olefin (3.3 mmol) were added. The apparatus was degassed and heated to reflux under nitrogen. A solution of **1** (160 mg, 1.29 mmol in 10 mL dichloromethane) was added over 8 h. Upon completion of addition, the reaction mixture was refluxed for a further 1h, then filtered through a short silica gel plug to remove the dirhodium catalyst. Analysis by  $^1\text{H}$  NMR was used to determine the ratios of *E*- and *Z*-cyclopropane isomers. Enantiomeric excess was determined by GC or HPLC, as indicated. Isolated yields of **3a-d** were determined after purification by silica gel column chromatography.

**3a:** (6:1 hexanes/EtOAc,  $R_f = 0.22$ ) 74%, white solid, mp 98  $^\circ\text{C}$ ; GC: (B-DM, 30m x 0.25 mm; 0.25  $\mu\text{m}$  film, 140  $^\circ\text{C}/10$  min, 1  $^\circ\text{C}/\text{min}$  ramp to 160  $^\circ\text{C}$ ), retention times of 45.3 min (minor) and 47.3 min (major), 84% ee;  $[\alpha]_{\text{D}}^{23} +83.6^\circ$  ( $c = 0.59$ ,  $\text{CHCl}_3$ );  $^1\text{H}$  NMR (400 MHz,  $\text{CDCl}_3$ )  $\delta$  7.35-7.20 (comp, 5H), 5.72 (dt,  $J = 10.0$ , 2.8 Hz, 1H), 5.01 (dd,  $J = 2.8$ , 1.8 Hz, 2H), 4.96 (dt,  $J = 10.0$ , 1.8 Hz, 1H), 3.25 (fortuitous t,  $J = 9.0$ , 7.7 Hz, 1H), 2.14 (dd,  $J = 9.0$ , 4.8 Hz), 1H), 1.56 (dd,  $J = 7.7$ , 4.8 Hz, 1H);  $^{13}\text{C}$  NMR (100 MHz,  $\text{CDCl}_3$ )  $\delta$  171.9, 135.5, 129.1, 128.4, 127.2, 124.7, 121.2, 69.2, 35.2, 26.8, 22.7; IR (neat) 3021, 2885, 1716  $\text{cm}^{-1}$ ; HRMS (EI) calcd for  $\text{C}_{13}\text{H}_{12}\text{O}_2$  200.0837, found 200.0834 ( $\text{M}^+$ ).

**3b:** (6:1 hexanes/EtOAc,  $R_f = 0.36$ ) 77%, clear oil, GC: (B-DM, 30m x 0.25 mm; 0.25  $\mu\text{m}$  film, 160  $^\circ\text{C}$  isotherm) retention times of 82.4 min (minor) and 96.0 min (major), 80% ee;  $[\alpha]_{\text{D}}^{21} +68.2^\circ$  ( $c = 0.63$ ,  $\text{CHCl}_3$ ).  $^1\text{H}$  NMR (400 MHz,  $\text{CDCl}_3$ )  $\delta$  5.80 (dt,  $J = 10.2$ , 2.8 Hz, 1H), 5.57-5.42 (m, 1H), 5.26 (dt,  $J = 10.2$ , 2.0 Hz, 1H), 5.01-4.99 (comp, 2H), 2.47-2.43 (m, 1H), 2.10-1.45 (comp, 9H), 1.27 (dd,  $J = 7.4$ , 4.4 Hz, 1H);  $^{13}\text{C}$  NMR (100 MHz,  $\text{CDCl}_3$ )  $\delta$  172.5, 133.0, 125.1, 125.0, 120.6, 69.1, 37.5, 29.5, 25.2, 25.1, 22.7, 22.31, 22.25; IR (neat) 3020, 2879, 1716  $\text{cm}^{-1}$ ; HRMS (EI) calcd for  $\text{C}_{13}\text{H}_{16}\text{O}_2$  204.1150, found 204.1148 ( $\text{M}^+$ ).

**3c:** (6:1 hexanes/EtOAc,  $R_f = 0.29$ ) 81%, clear oil, 8:1 mixture *E,Z*-**3c** diastereomers. Diastereomeric ratio determined by  $^1\text{H}$  NMR prior to chromatography (*E*-**3c** 6.38 ppm, *Z*-**3c** 6.47 ppm). Isolated yield of *E,Z*-**3c** obtained upon initial column chromatography (6:1 hexanes/EtOAc). Diastereomers isolated by further silica gel column chromatography (*E*-**3c**  $R_f = 0.44$ , dichloromethane).

*E*-**3c**: Clear oil, HPLC: (AD-H, 98:2 hexanes/2-propanol, 1 mL/min) retention times of 11.8 min (major) and 13.2 min (minor), 86% ee;  $[\alpha]_{\text{D}}^{21} +77.8^\circ$  ( $c = 0.73$ ,  $\text{CHCl}_3$ );  $^1\text{H}$

NMR (400 MHz, CDCl<sub>3</sub>)  $\delta$  7.36-7.23 (comp, 5H), 6.38 (s, 1H), 5.84 (dt,  $J$  = 10.2, 2.8 Hz, 1H), 5.33 (br d,  $J$  = 10.2 Hz, 1H), 5.05-5.03 (comp, 2H), 2.72 (fortuitous t,  $J$  = 7.9 Hz, 1H), 1.96 (dd,  $J$  = 8.7, 4.7 Hz, 1H), 1.91 (s, 3H), 1.47 (dd,  $J$  = 7.4, 4.7 Hz, 1H); <sup>13</sup>C NMR (100 MHz, CDCl<sub>3</sub>)  $\delta$  172.2, 137.1, 133.6, 128.8, 128.2, 128.0, 126.6, 124.6, 121.2, 69.1, 39.7, 25.8, 23.1, 19.1; IR (neat) 3050, 2884, 1722 cm<sup>-1</sup>; HRMS (EI) calcd for C<sub>16</sub>H<sub>16</sub>O<sub>2</sub> 240.1150, found 204.1141 (M<sup>+</sup>).

**3d**: (6:1 hexanes/EtOAc, R<sub>f</sub> = 0.33) 86%, clear oil, 5:1 mixture of *E,Z*-**3d** diastereomers. Diastereomeric ratio determined by <sup>1</sup>H NMR prior to chromatography (*E*-**3d** 1.28 ppm, *Z*-**3d** 1.45 ppm). Isolated yield of *E,Z*-**3d** obtained upon initial column chromatography (6:1 hexanes/EtOAc). Diastereomers separated by further chromatography (*E*-**3d** R<sub>f</sub> = 0.54, *Z*-**3d** R<sub>f</sub> = 0.25, dichloromethane).

**Z-3d**: Clear oil, <sup>1</sup>H NMR (400 MHz, CDCl<sub>3</sub>)  $\delta$  7.36-7.19 (comp, 5H), 6.59 (d,  $J$  = 15.9 Hz, 1H), 6.34 (dd,  $J$  = 15.9, 9.1 Hz, 1H), 5.84 (ddd,  $J$  = 9.9, 3.6, 2.4 Hz, 1H), 5.31 (ddd,  $J$  = 9.9, 2.4, 1.2 Hz, 1H), 5.03 (dt,  $J$  = 16.5, 2.4, 1H), 4.95 (ddd,  $J$  = 16.5, 3.6, 1.2 Hz, 1H), 2.16-2.10 (m, 1H), 2.05 (dd,  $J$  = 7.6, 4.8 Hz, 1H), 1.45 (dd,  $J$  = 8.5, 4.8 Hz, 1H); <sup>13</sup>C NMR (100 MHz, CDCl<sub>3</sub>)  $\delta$  169.3, 136.9, 132.3, 128.7, 128.5, 127.3, 126.10, 126.06, 120.8, 69.1, 36.6, 28.8, 24.9; IR (neat) 3020, 1722 cm<sup>-1</sup>; HRMS (EI) calcd for C<sub>15</sub>H<sub>14</sub>O<sub>2</sub> 226.0994, found 226.0989 (M<sup>+</sup>).

**E-3d**: Clear oil, HPLC (OD-H, 90:10 hexanes/2-propanol, 1 mL/min) retention times of 15.0 min (minor) and 18.9 min (major), 73% ee; [ $\alpha$ ]<sub>D</sub><sup>22</sup> +59.3° ( $c$  = 0.69, CHCl<sub>3</sub>). <sup>1</sup>H NMR (400 MHz, CDCl<sub>3</sub>)  $\delta$  7.36-7.21 (comp, 5H), 6.60 (d,  $J$  = 15.8 Hz, 1H), 5.96 (dd,  $J$  = 15.8, 8.3 Hz, 1H), 5.86 (dt,  $J$  = 10.0, 2.9, 1H), 5.46 (dt,  $J$  = 10.0, 2.1 Hz, 1H), 5.02-5.01 (comp, 2H), 2.76-2.70 (m, 1H), 2.11 (dd,  $J$  = 8.9, 4.6 Hz, 1H), 1.28 (dd,  $J$  = 7.3, 4.6 Hz, 1H); <sup>13</sup>C NMR (100 MHz, CDCl<sub>3</sub>)  $\delta$  171.6, 136.6, 133.7, 128.6, 127.6, 126.0, 125.7, 125.9, 121.7, 69.1, 34.4, 27.4, 25.0; IR (neat) 3024, 1721 cm<sup>-1</sup>; HRMS (EI) calcd for C<sub>15</sub>H<sub>14</sub>O<sub>2</sub> 226.0994, found 226.0989 (M<sup>+</sup>).

**Reduction and Cope rearrangement of 3d**: Unseparated *E,Z*- **3d** (5:1 *E:Z*) (203 mg, 0.90 mmol) was stirred in anhydrous THF (10 mL) at 0 °C. LiAlH<sub>4</sub> (93 mg, 2.7 mmol) was added portionwise and the reaction mixture was heated to reflux under nitrogen. After 36 h the solution was cooled to 0 °C and quenched *via* dropwise addition of water until gas was no longer observed evolving. An aqueous solution of NaOH (0.5 mL, 50 wt%) was added, and the mixture was allowed to stir for 10 min. Anhydrous Na<sub>2</sub>SO<sub>4</sub> was added and the mixture stirred 2h. The resulting aluminium salts were removed by filtration through Celite, washing with Et<sub>2</sub>O five times (20 mL). Solvent was removed from the filtrate by rotary evaporation, and the residue was recrystallized from a minimal amount of dichloromethane and hexanes to yield **4** (110 mg, 53%, 92% ee) as a white crystalline solid: mp 114 °C, GC: (B-DM, 30m x 0.25 mm; 0.25  $\mu$ m film, 140 °C/10 min, 1 °C/min ramp to 160 °C) retention times of 68.7 min (minor) and 70.5 min (major), 92% ee; [ $\alpha$ ]<sub>D</sub><sup>20</sup> -60.6° ( $c$  = 0.34, CHCl<sub>3</sub>); <sup>1</sup>H NMR (400 MHz, CDCl<sub>3</sub>)  $\delta$  7.30-7.20 (comp, 5H), 5.80-5.73 (comp, 2H), 5.61-5.57 (m, 1H), 4.05 (s, 2H), 3.58-3.53 (m, 1H), 3.43 (dd,  $J$  = 10.4, 4.9 Hz, 1H), 3.37 (dd,  $J$  = 10.4, 6.2 Hz, 1H), 3.13-3.08 (m, 1H), 2.95-2.89 (m, 1H), 2.77 (dd,  $J$  = 18.9, 6.5 Hz, 1H), 1.99 (br s, 1H), 1.67 (br s, 1H); <sup>13</sup>C NMR (100 MHz,

CDCl<sub>3</sub>)  $\delta$  144.0, 142.9, 133.8, 128.5, 128.2, 126.8, 126.5, 126.2, 68.0, 65.0, 45.6, 45.0, 28.6; IR (neat) 3020 cm<sup>-1</sup>.

**Determination of absolute stereochemistry of 2a:** A sample of **2a,b** (9:1, 84 mg, 0.48 mmol) obtained from the Rh<sub>2</sub>(4*S,R*-MenthAZ) catalyzed C-H insertion (80% ee as measured by GC) was stirred in toluene (10 mL). 2,3-Dichloro-5,6-dicyano-1,4-benzoquinone (216 mg, 0.96 mmol) was added. After 2 h, the toluene was evaporated and the reaction mixture was quickly passed through a short silica gel plug (3:1 hexane/ethyl acetate) to remove a bright red colored baseline impurity. The resulting solution was evaporated to a yellow oil. Ethyl acetate (5 mL) was added, followed by 10% Pd/C (10 mg). The atmosphere was purged and replaced with hydrogen. After stirring 12 h, the mixture was filtered through a celite pad, washing with ethyl acetate, and evaporated. Column chromatography (4:1 hexane:ethyl acetate, R<sub>f</sub> = 0.30) provided 2-phenyl- $\delta$ -valerolactone (71 mg, 86% yield).<sup>4</sup> The optical rotation of 2-phenyl- $\delta$ -valerolactone was measured:  $[\alpha]_D^{23} +14.1^\circ$  ( $c = 0.28$ , CHCl<sub>3</sub>). A previous report lists the optical rotation of the *R* enantiomer (72% ee) to be:  $[\alpha]_D^{22} +32.6^\circ$  ( $c = 0.424$ , CHCl<sub>3</sub>), indicating the absolute stereochemistry of the predominant enantiomer of **2a** to be *R*.<sup>5</sup>

---

<sup>4</sup> Betancourt de Perez, R. M.; Fuentes, L. M.; Larson, G. L.; Barnes, C. L.; Heeg, M. J. *J. Org. Chem.* **1986**, *51*, 2039.

<sup>5</sup> Nakamura, Y.; Takeuchi, S.; Ohgo, Y.; Yamaoka, M.; Yoshida, A.; Mikami, K. *Tetrahedron* **1999**, *55*, 4959.

**Determination of relative stereochemistry of 2b, 3a:**

nOe experiments were performed on a Bruker AM-400 instrument using a Gauss1.1000 shape pulse and gradient selection. Observed correlations were used to assign the relative stereochemistry of **2b**, **3a** as those shown.

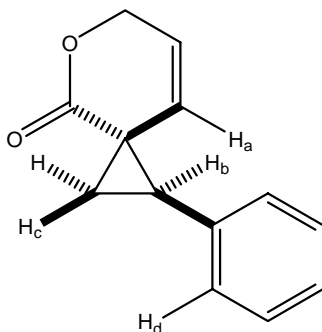

| <b>Irradiated Signal<br/>(ppm)/H<sub>x</sub></b> | <b>Correlated Signals<br/>(ppm)/H<sub>x</sub></b> | <b>% Correlation</b> |
|--------------------------------------------------|---------------------------------------------------|----------------------|
| 4.96/H <sub>a</sub>                              | 1.56/H <sub>c</sub>                               | 1.3                  |
|                                                  | 7.21 (d, <i>J</i> = 7.3 Hz)/H <sub>d</sub>        | 0.8                  |
|                                                  | 3.25/H <sub>b</sub>                               | 0                    |
| 3.25/H <sub>b</sub>                              | 7.21 (d, <i>J</i> = 7.3 Hz)/H <sub>c</sub>        | 1.1                  |
| 1.56/H <sub>c</sub>                              | 4.96/H <sub>a</sub>                               | 0.9                  |
|                                                  | 7.21 (d, <i>J</i> = 7.3 Hz)/H <sub>d</sub>        | 2.1                  |

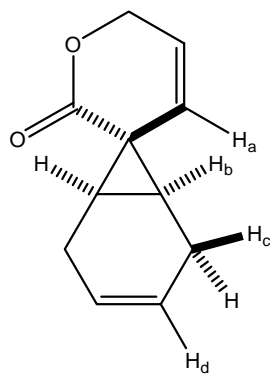

| <b>Irradiated Signal<br/>(ppm)/H<sub>x</sub></b> | <b>Correlated Signals<br/>(ppm)/H<sub>x</sub></b> | <b>% Correlation</b> |
|--------------------------------------------------|---------------------------------------------------|----------------------|
| 5.63/H <sub>d</sub>                              | 5.42/H <sub>a</sub>                               | 0.1                  |
| 5.42/H <sub>a</sub>                              | 5.63/H <sub>d</sub>                               | 0.3                  |
|                                                  | 2.09-2.01/H <sub>c</sub>                          | 1.1                  |
|                                                  | 2.19-2.16/H <sub>b</sub>                          | 0                    |
| 2.09-2.01/H <sub>c</sub>                         | 5.42/H <sub>a</sub>                               | 0.7                  |

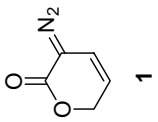

6.21  
6.21  
6.20  
6.19  
6.18  
6.18  
5.40  
5.39  
5.38  
5.37  
5.36  
5.36  
4.99  
4.99  
4.99  
4.98

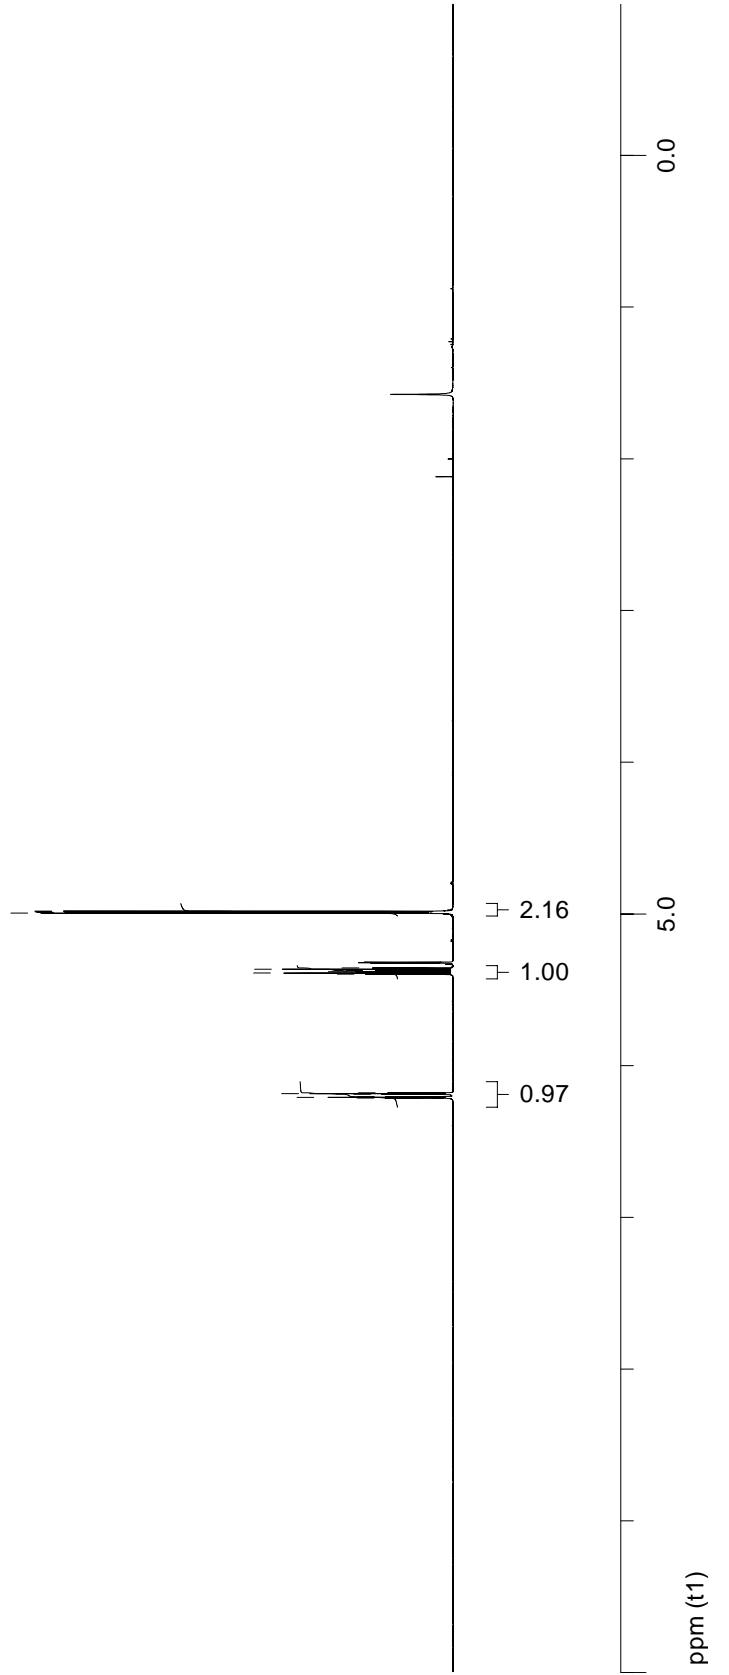



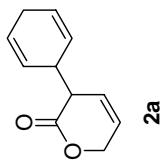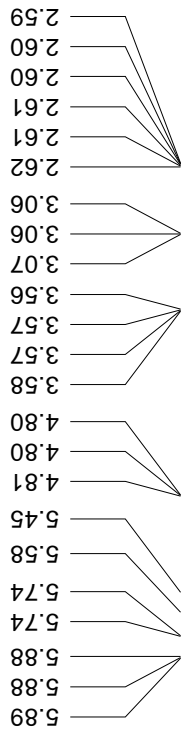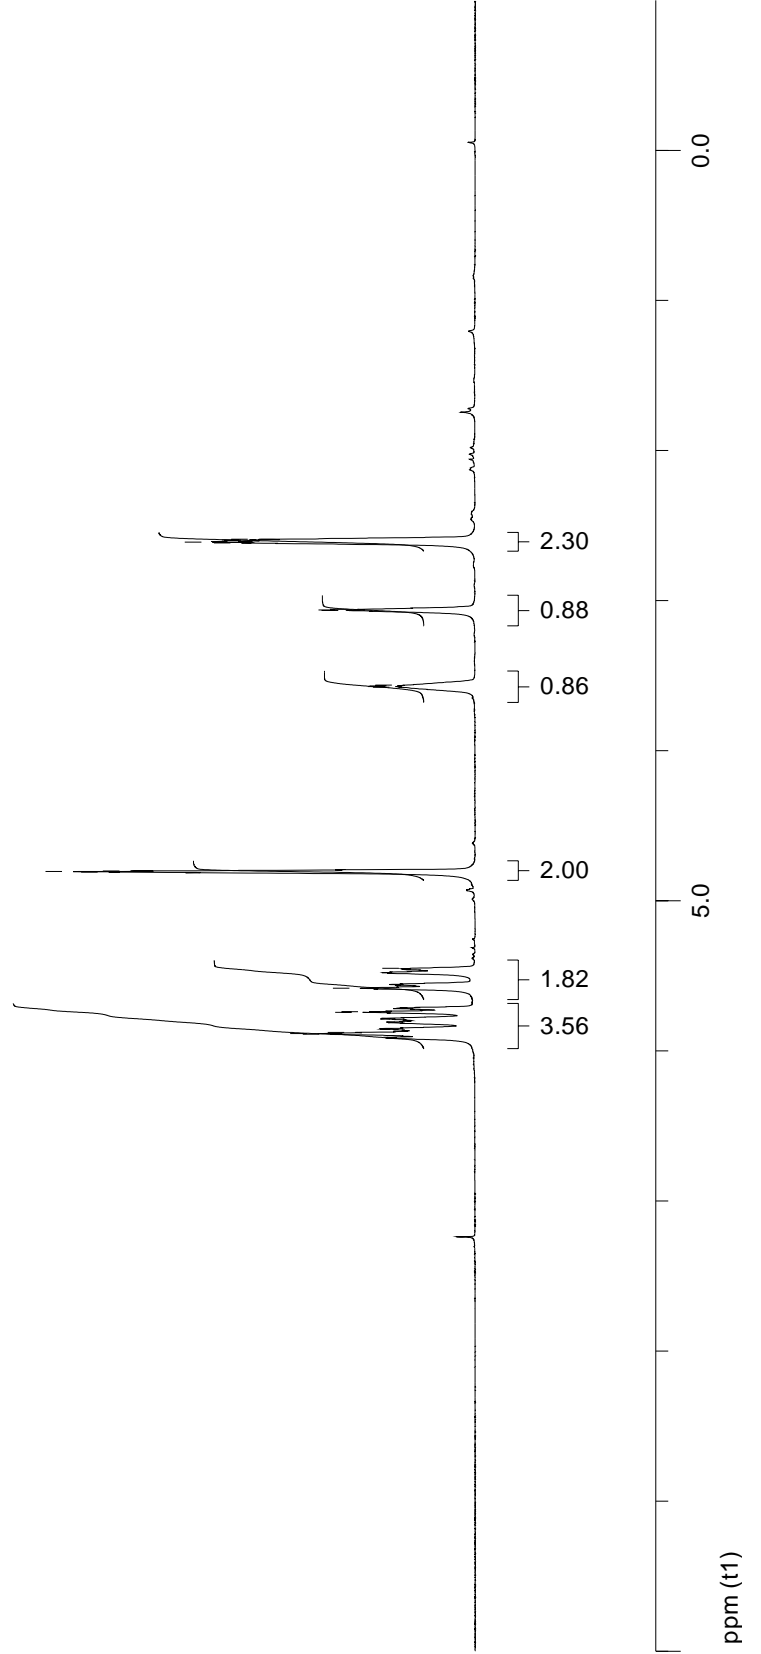

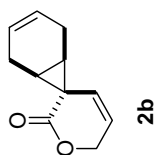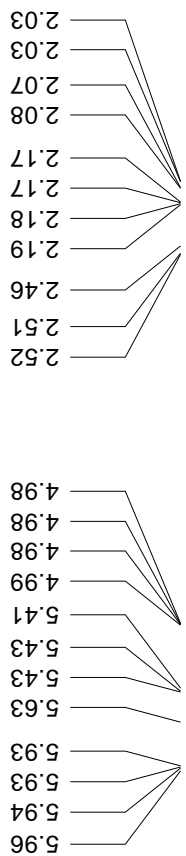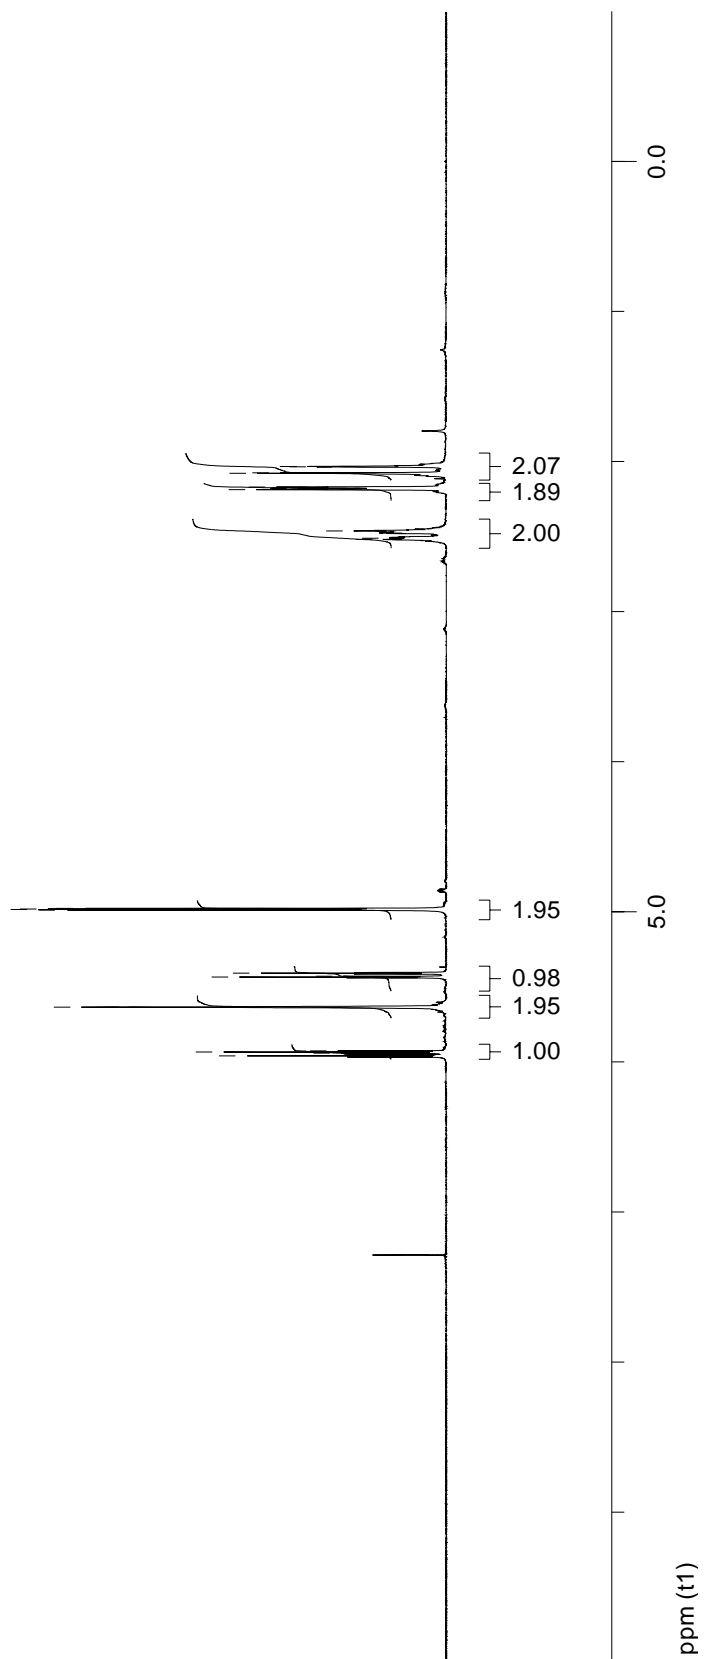

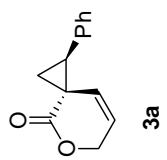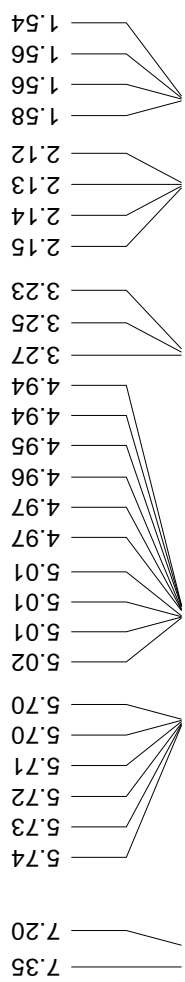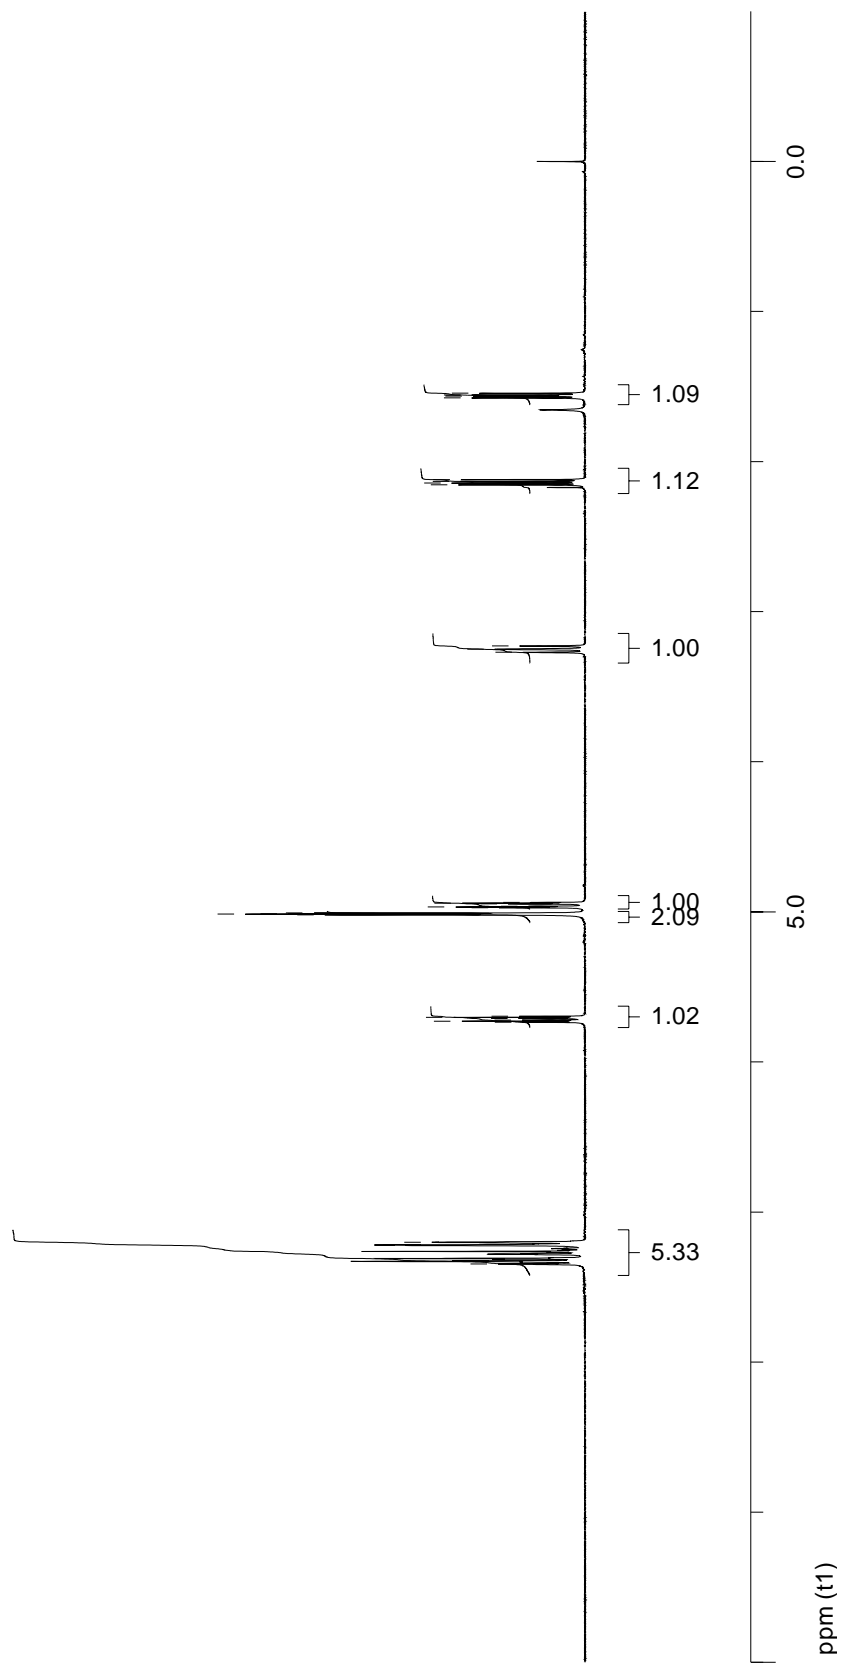

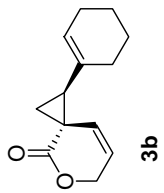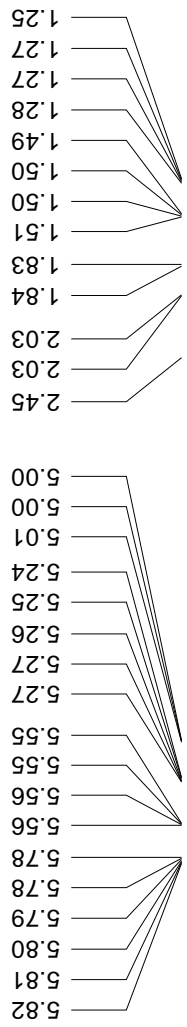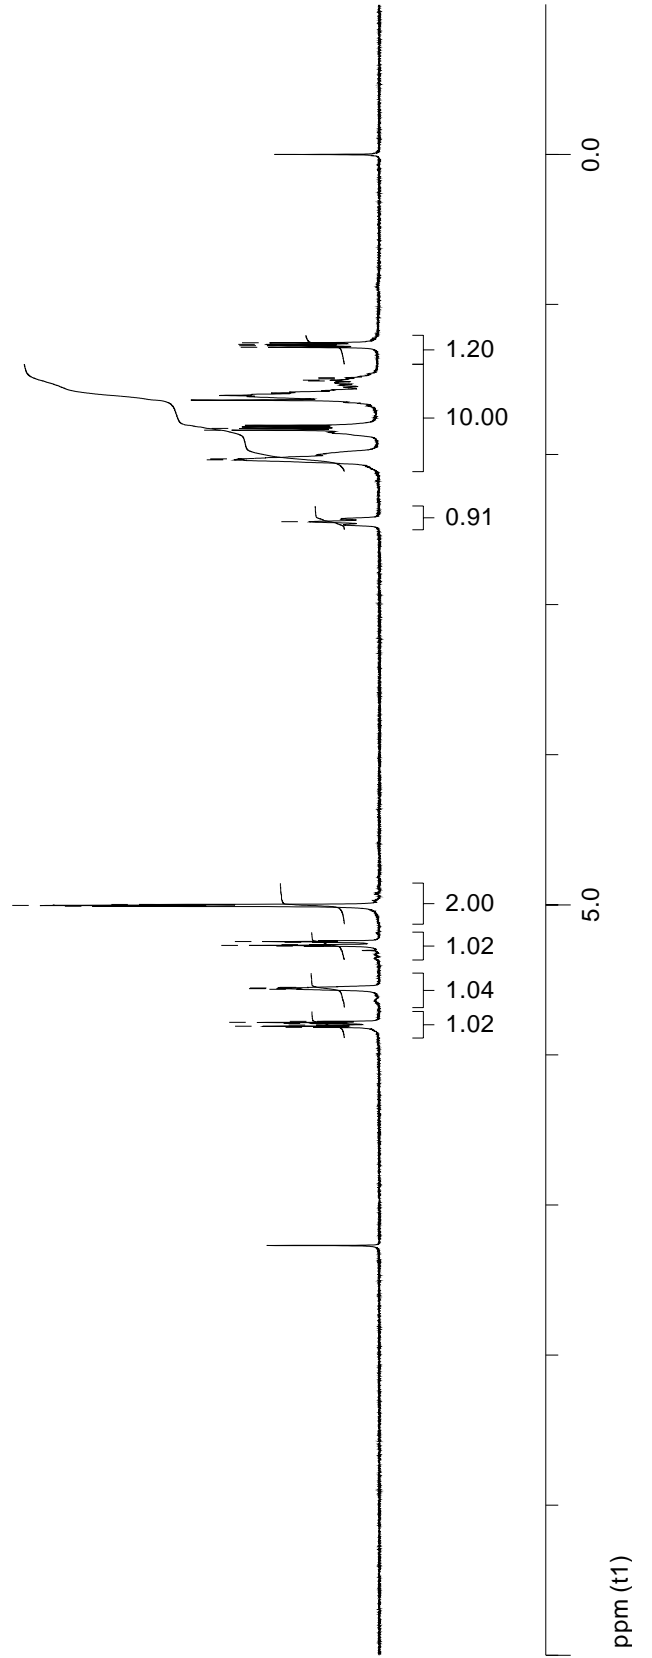

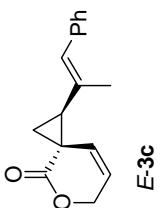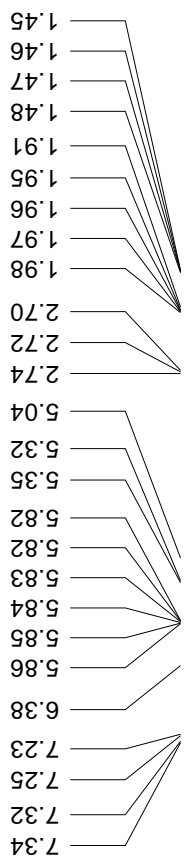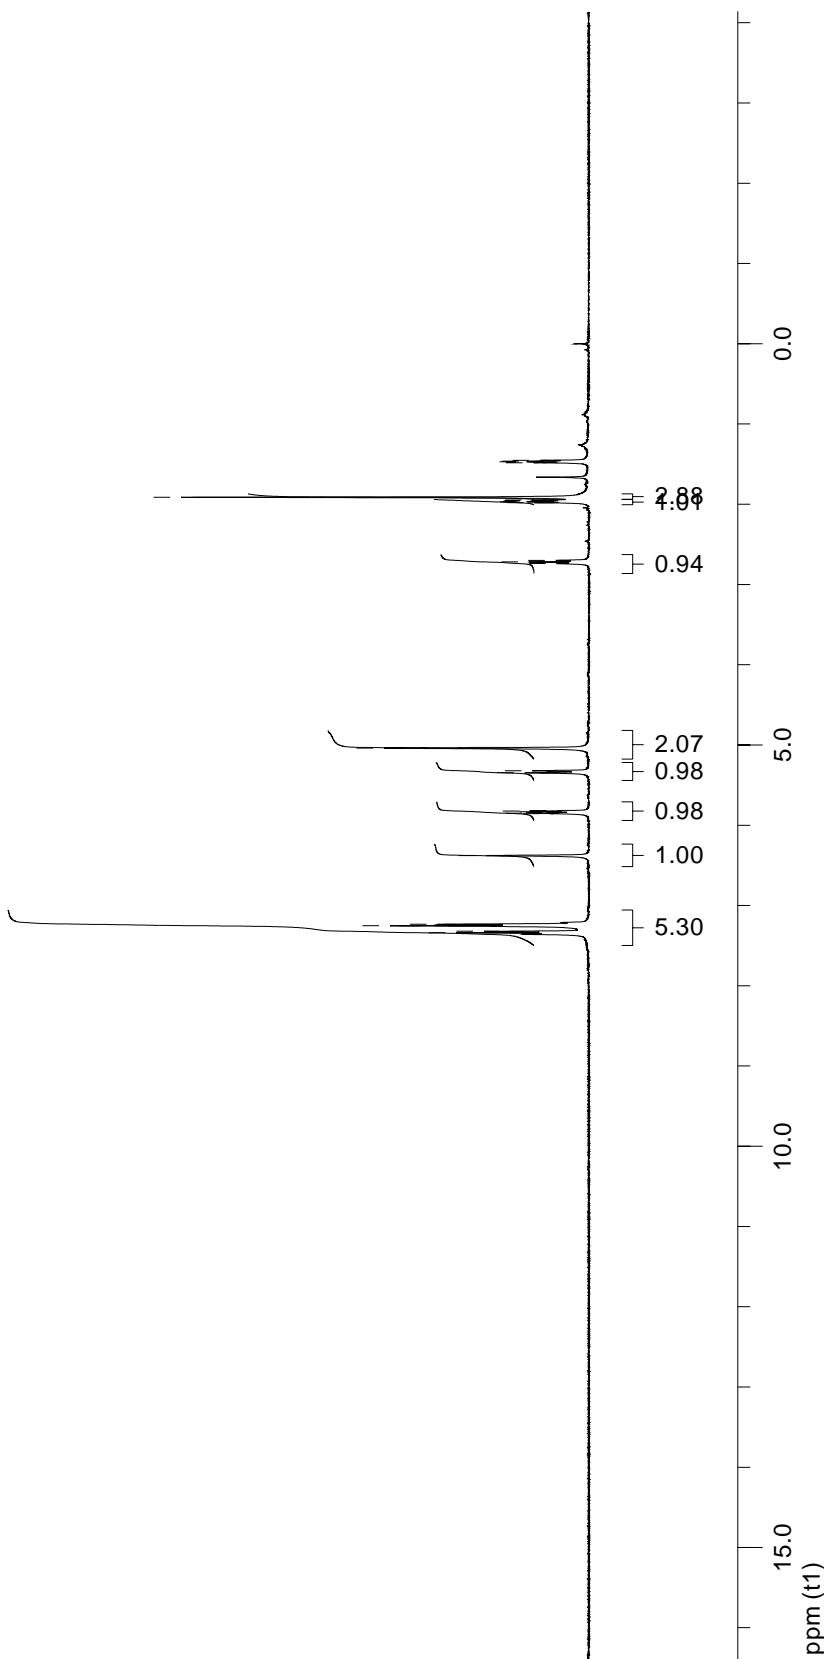

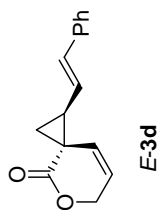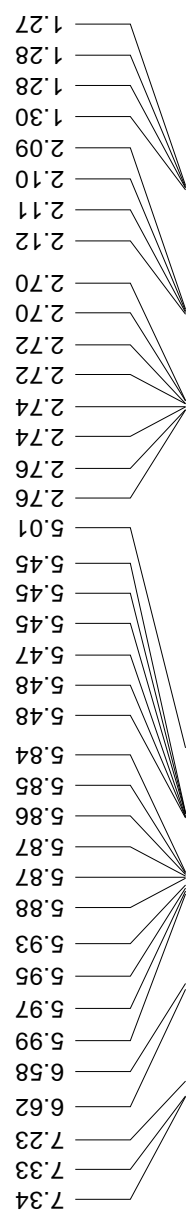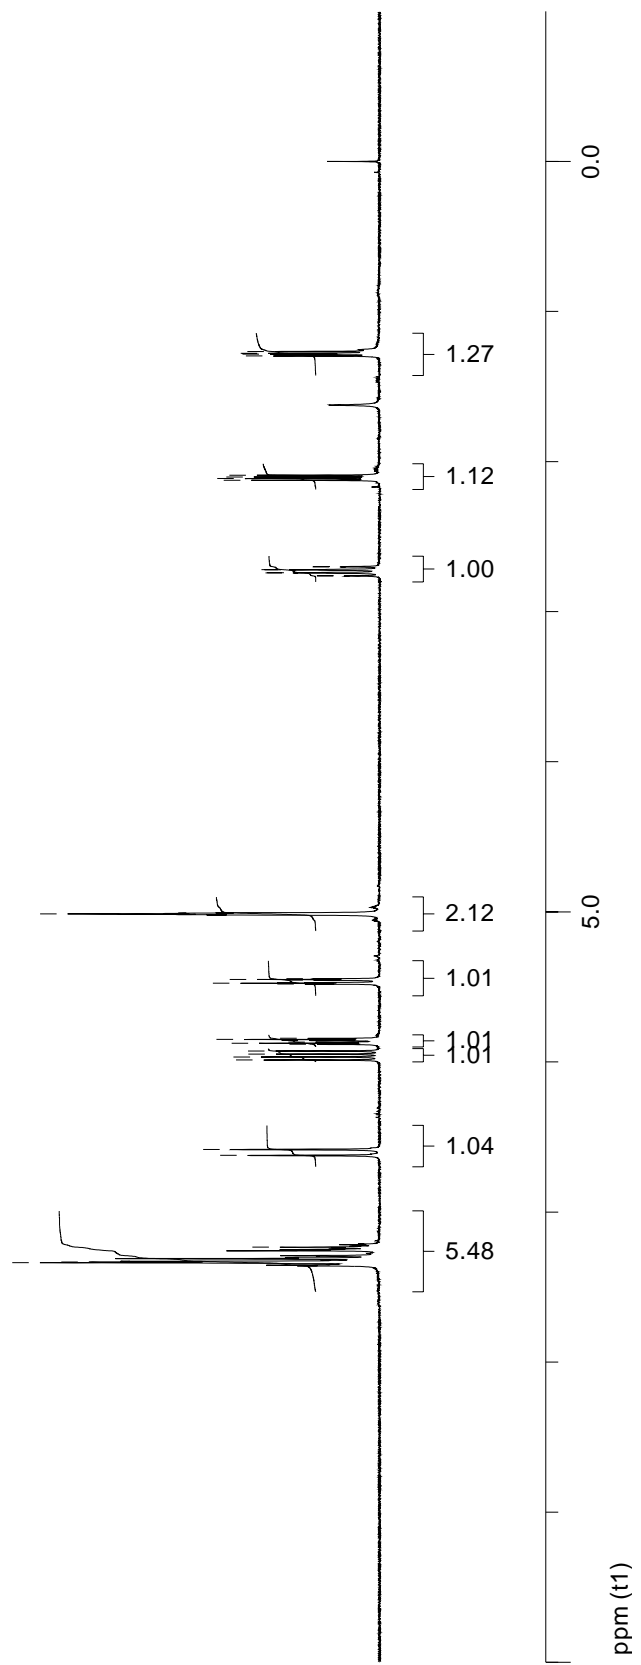

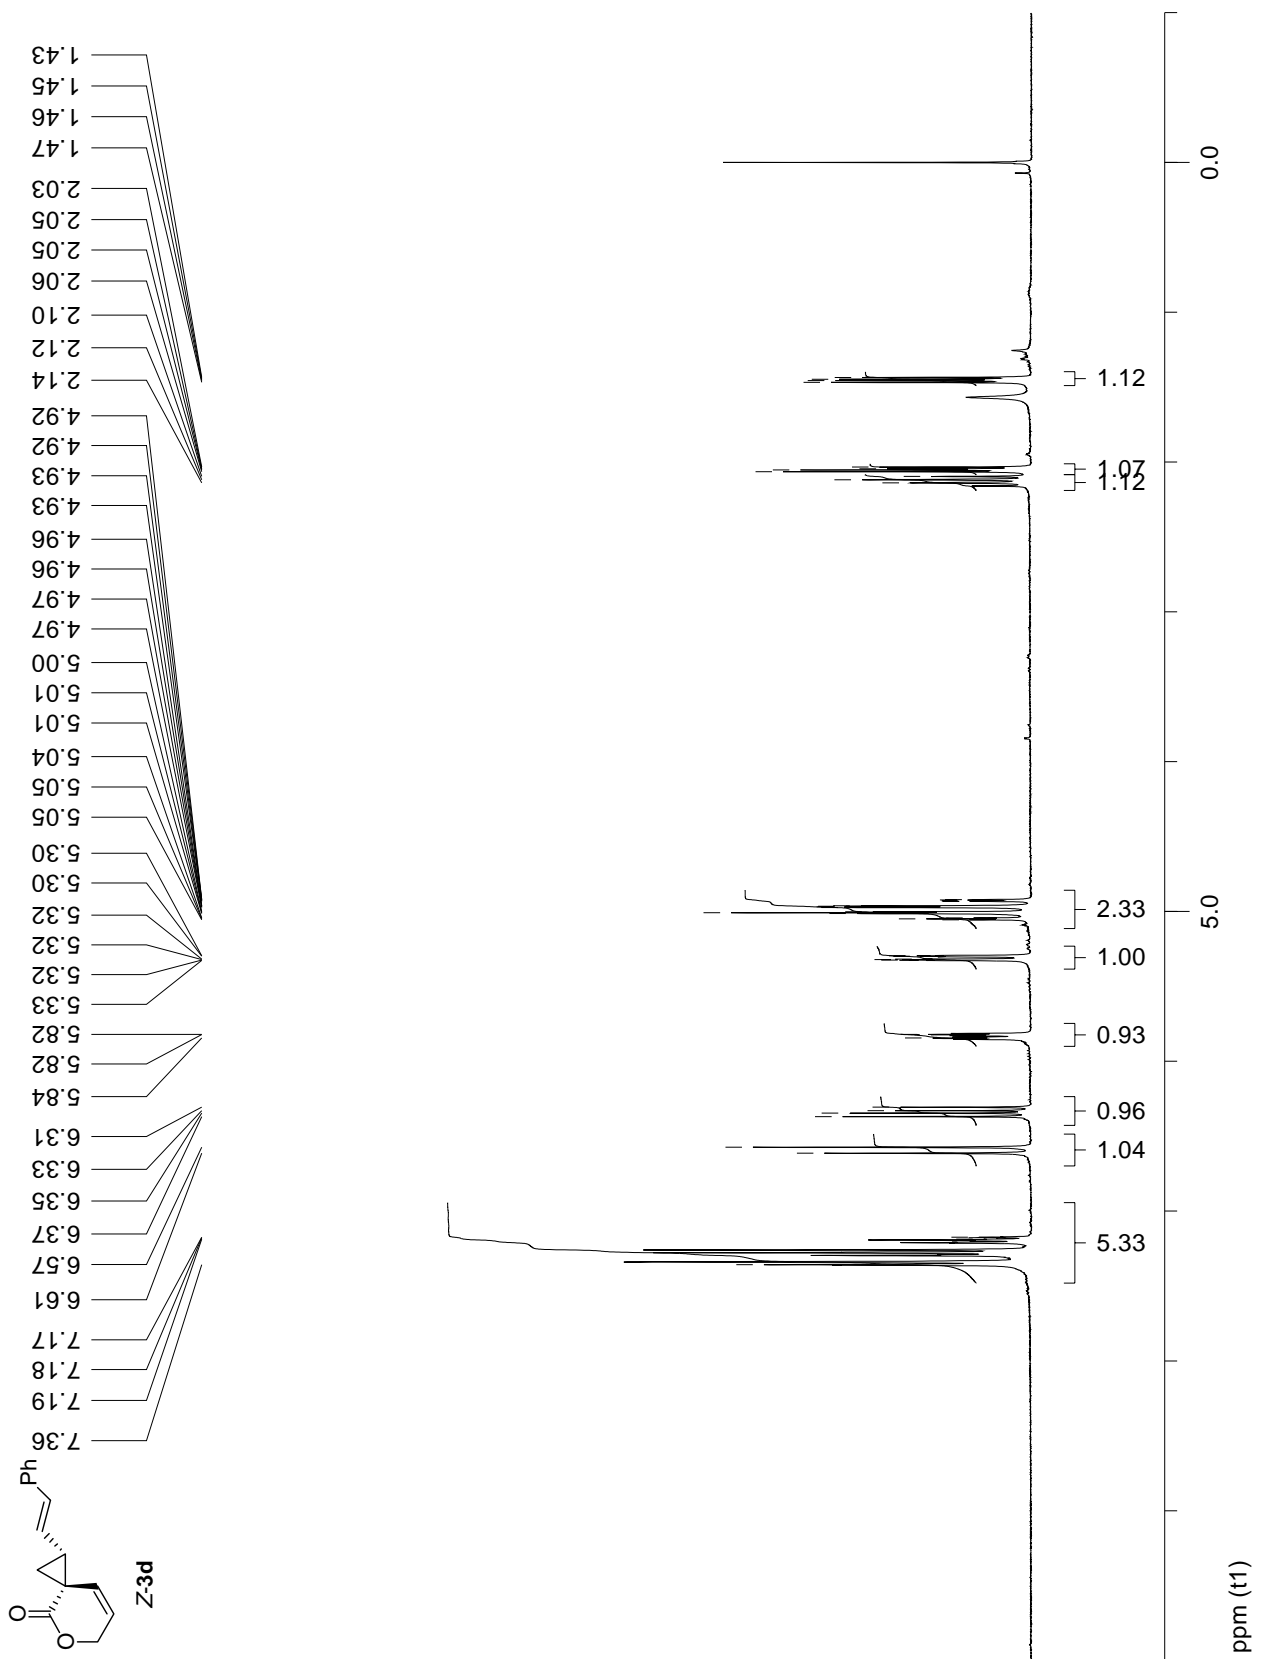

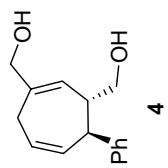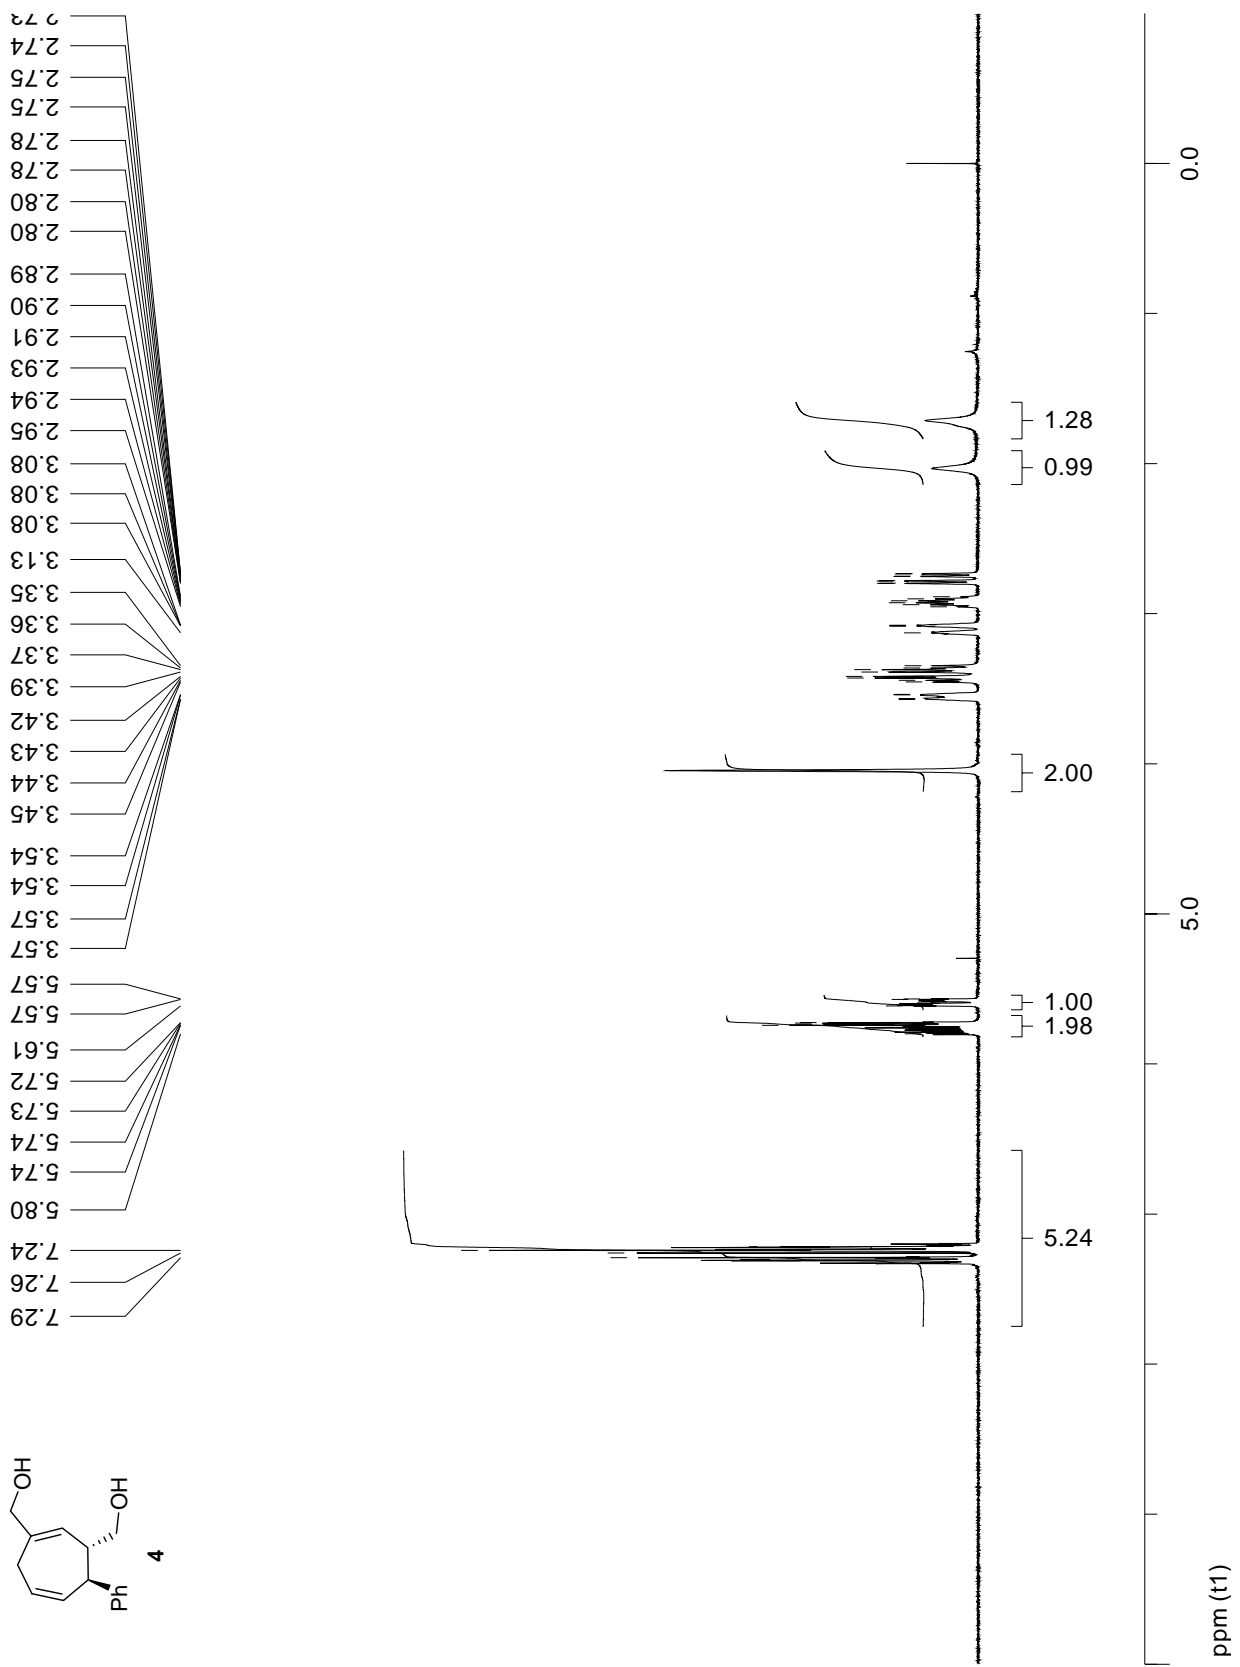



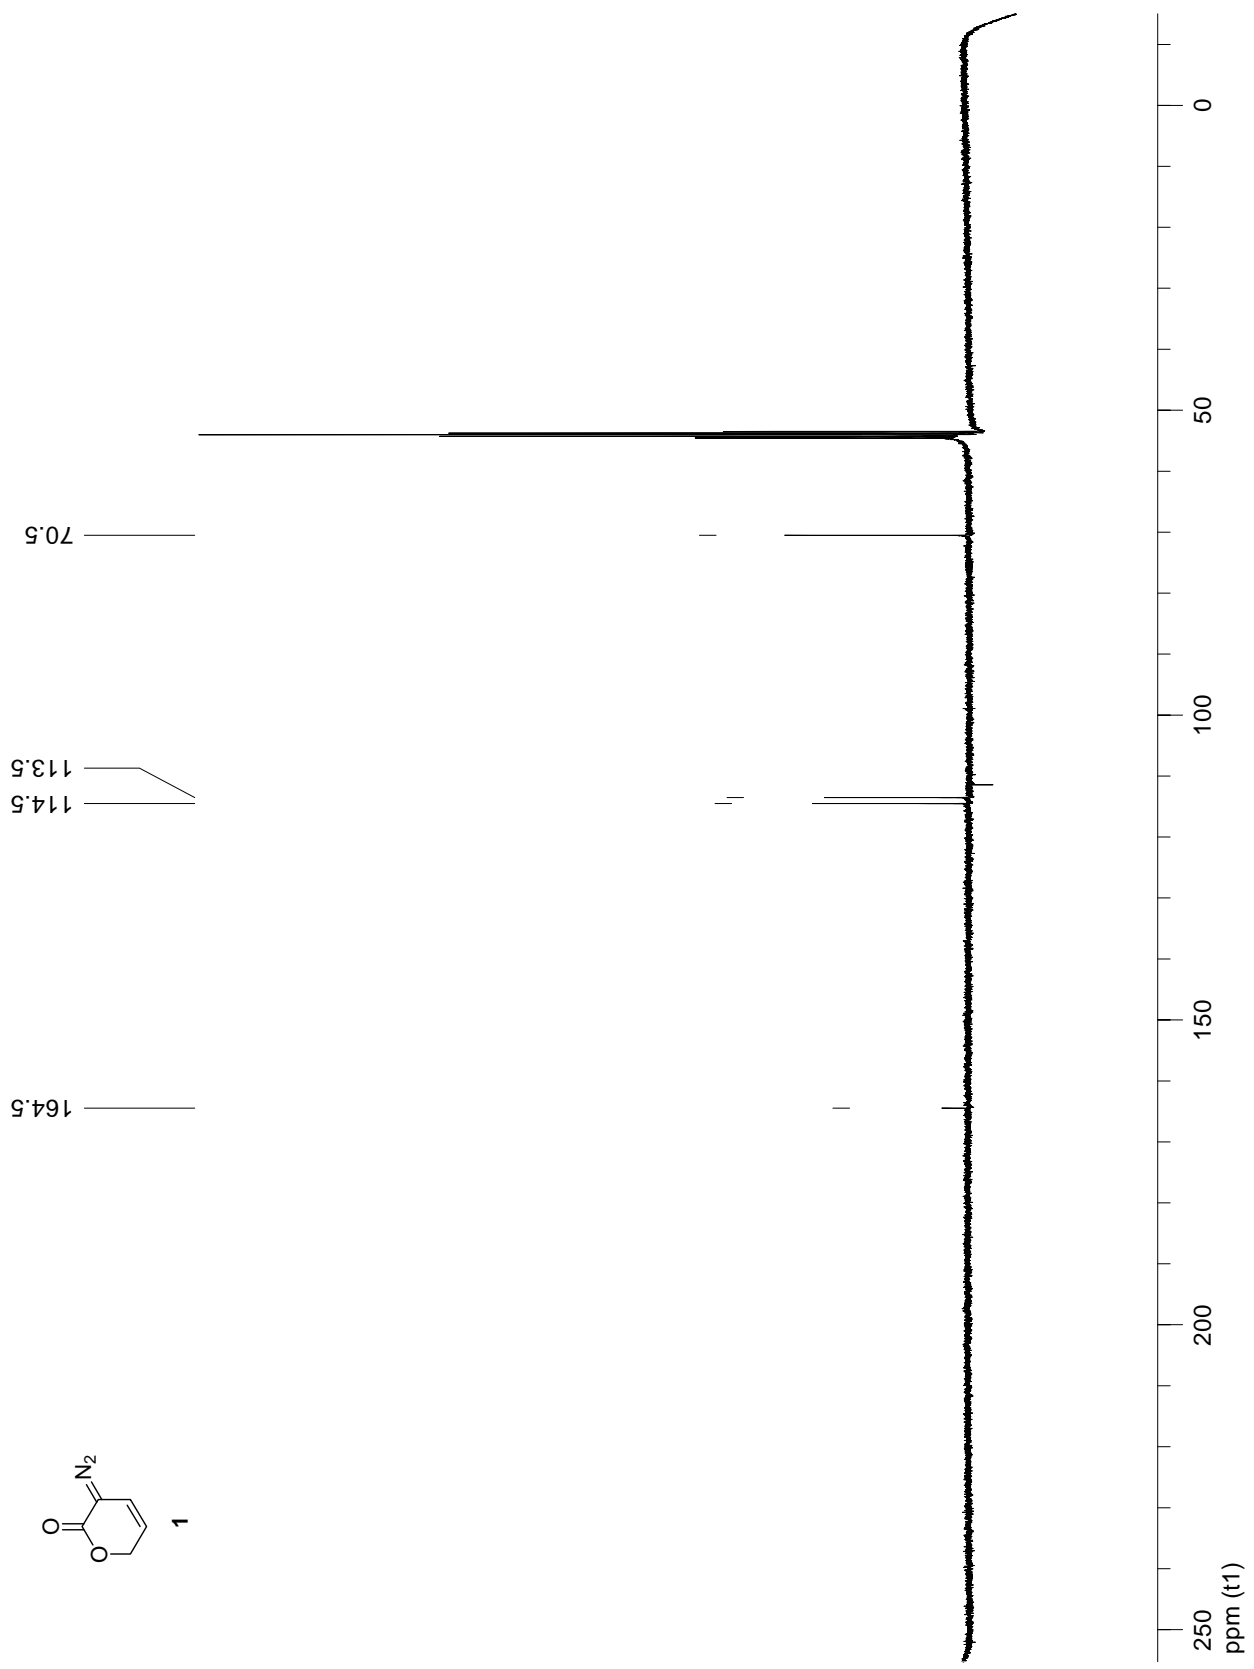

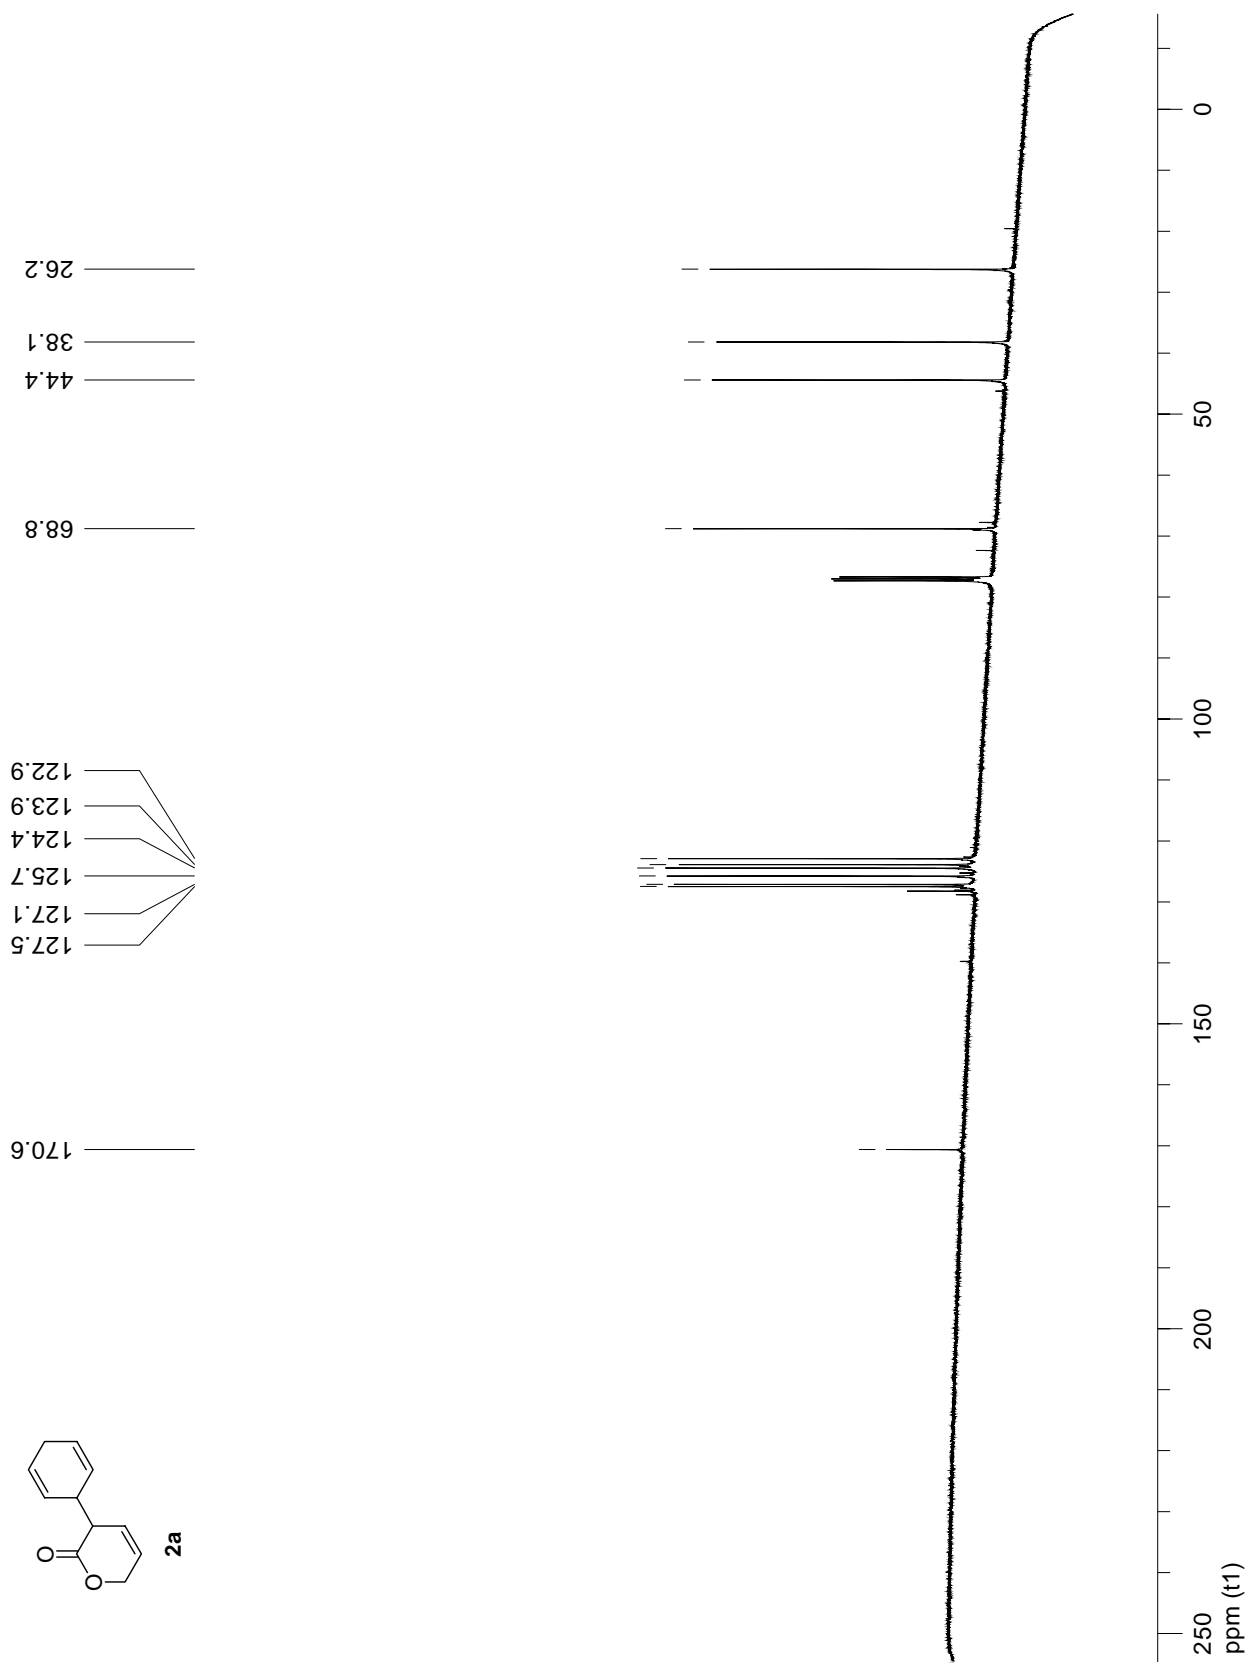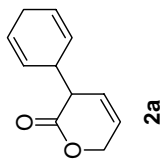

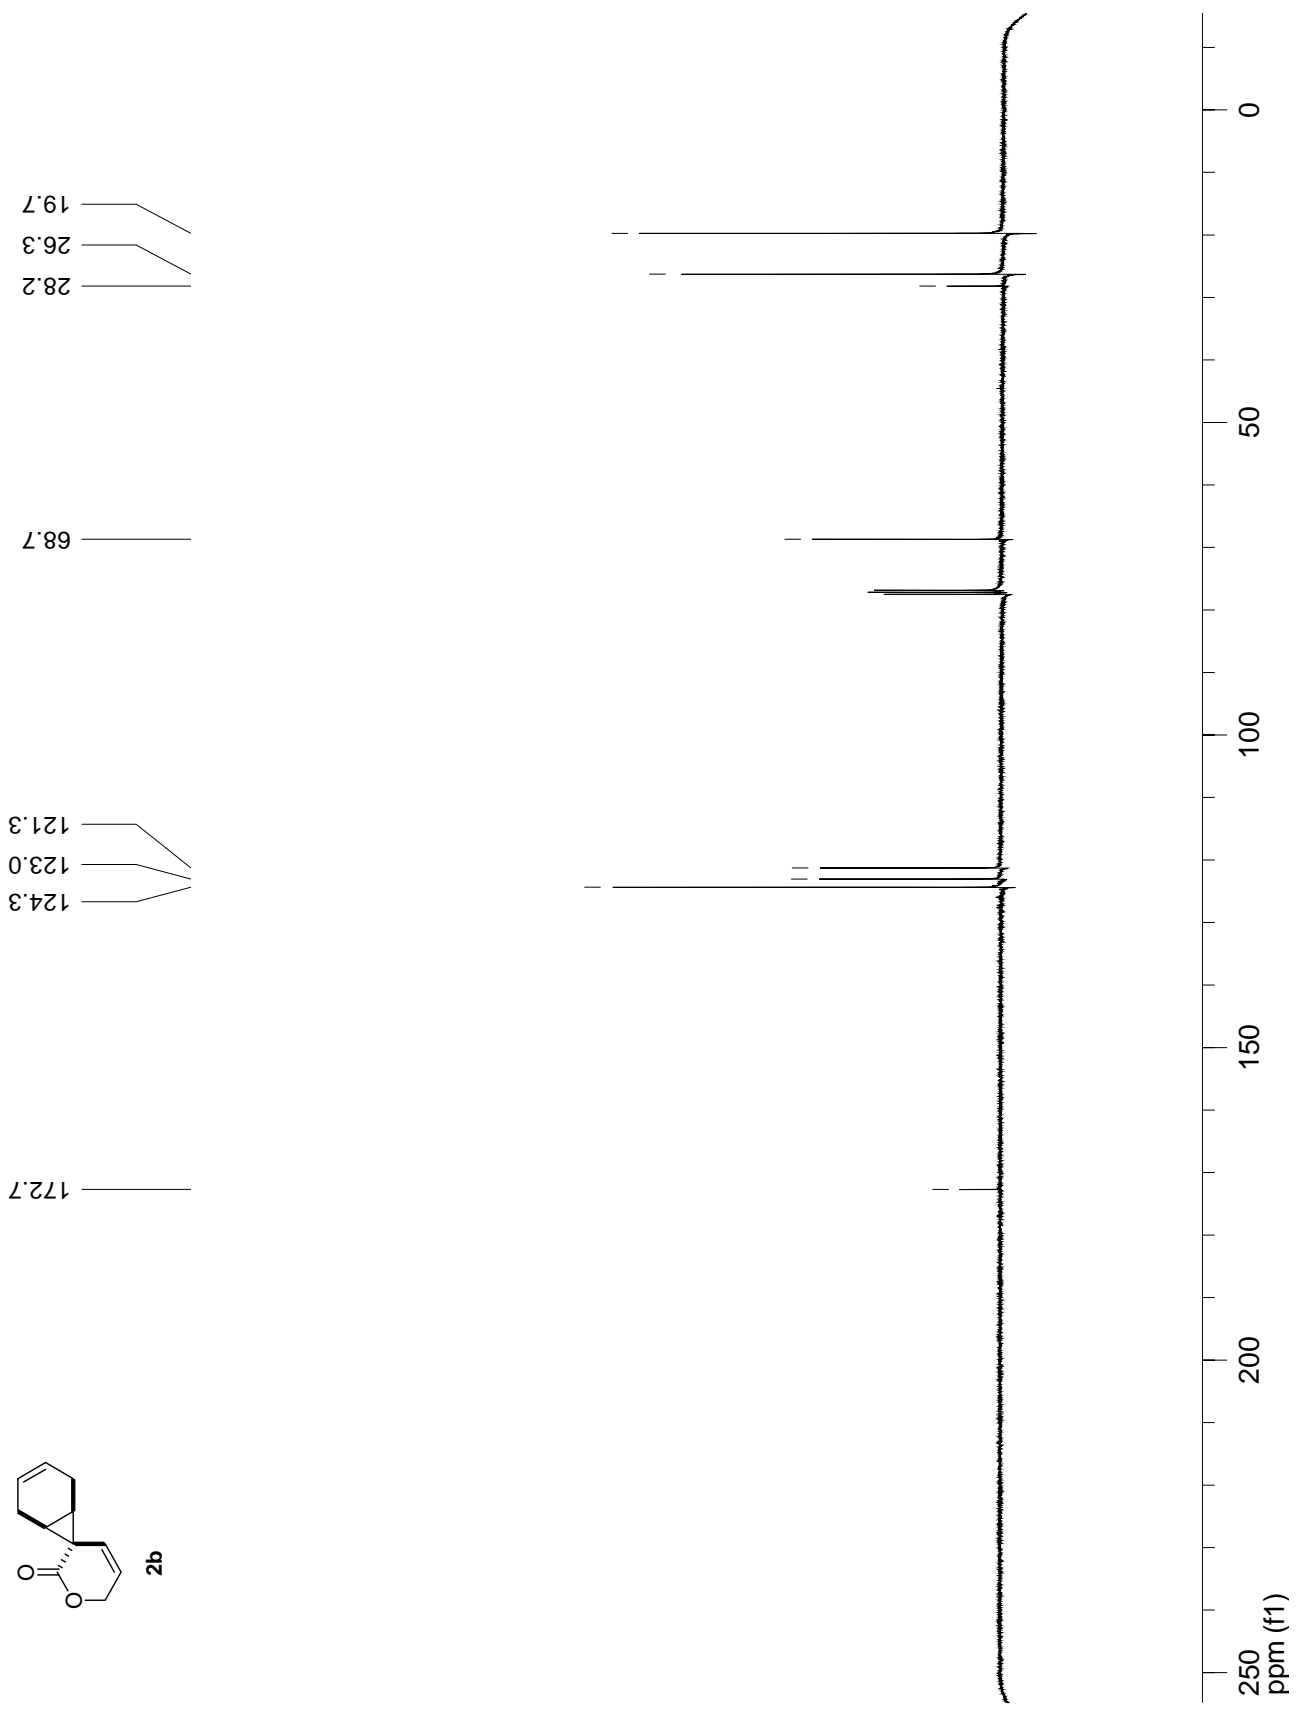

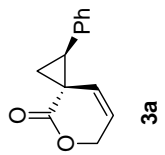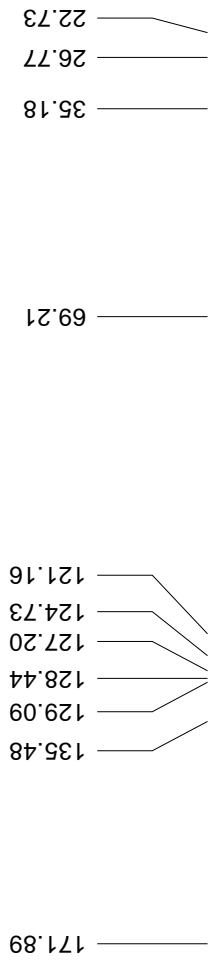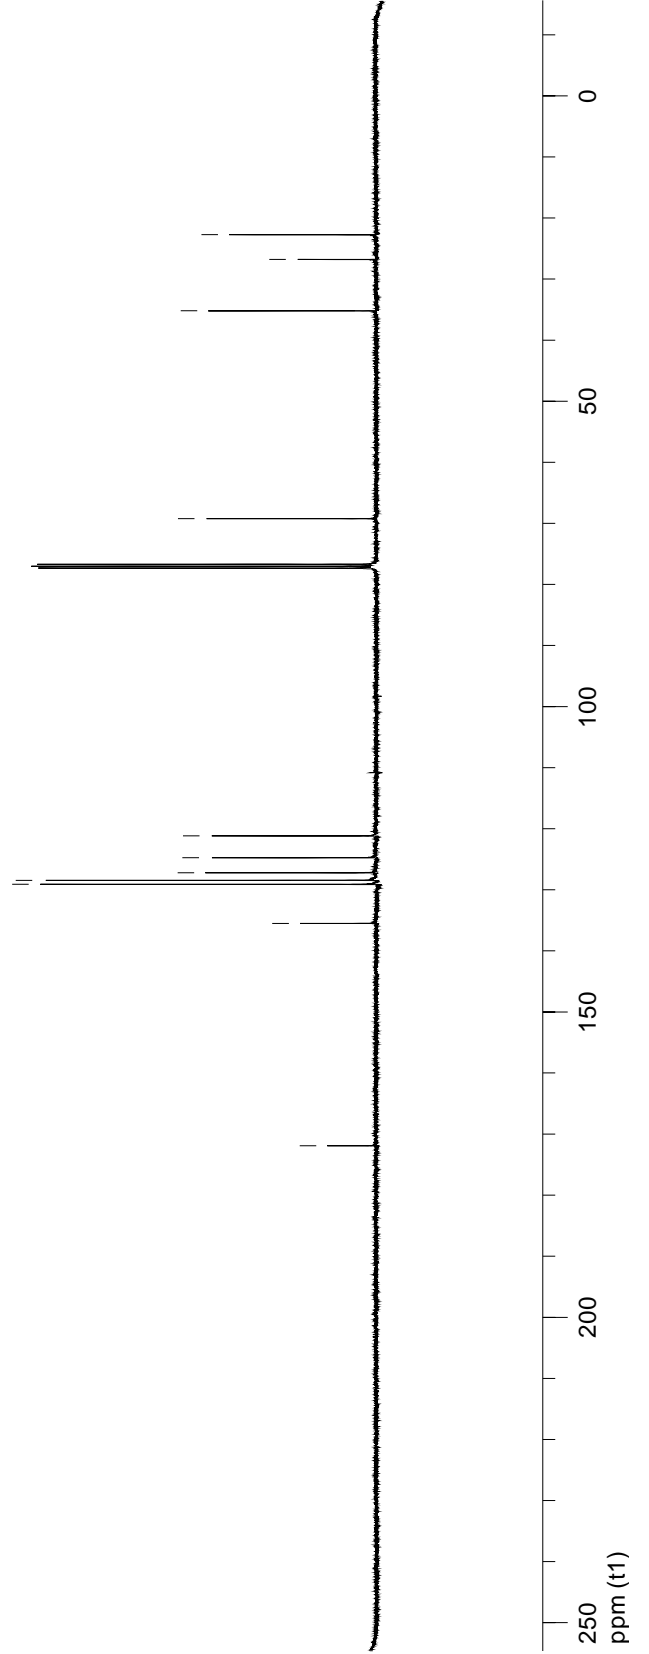

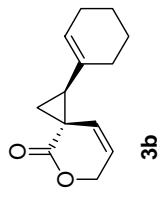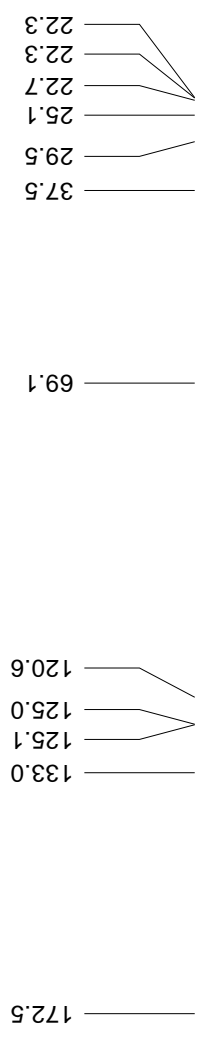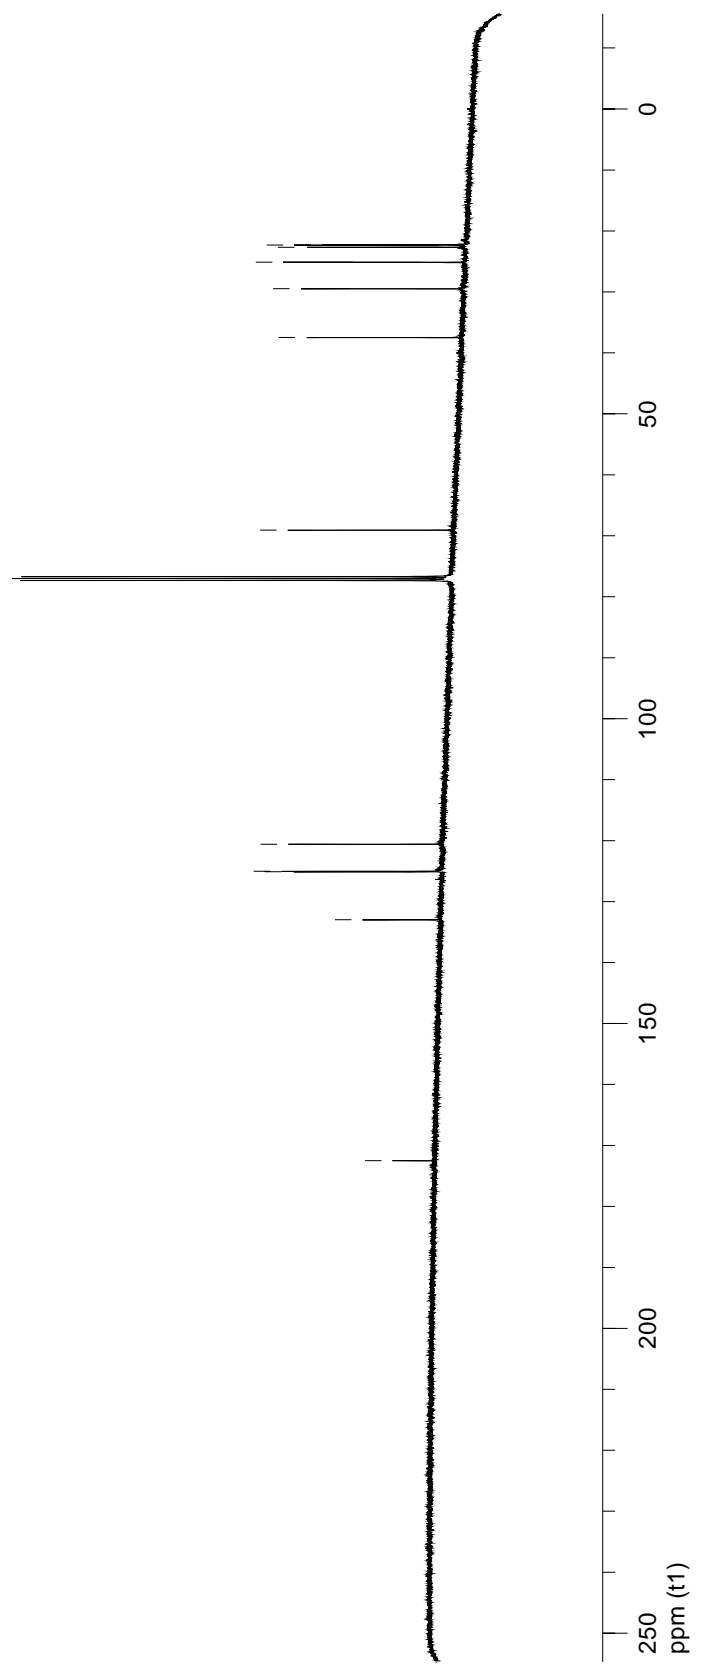

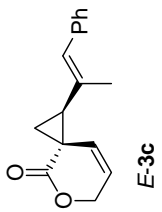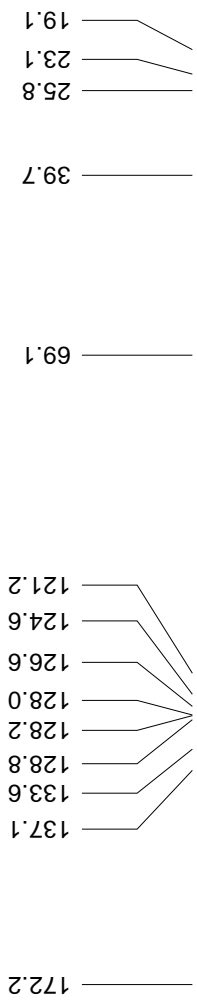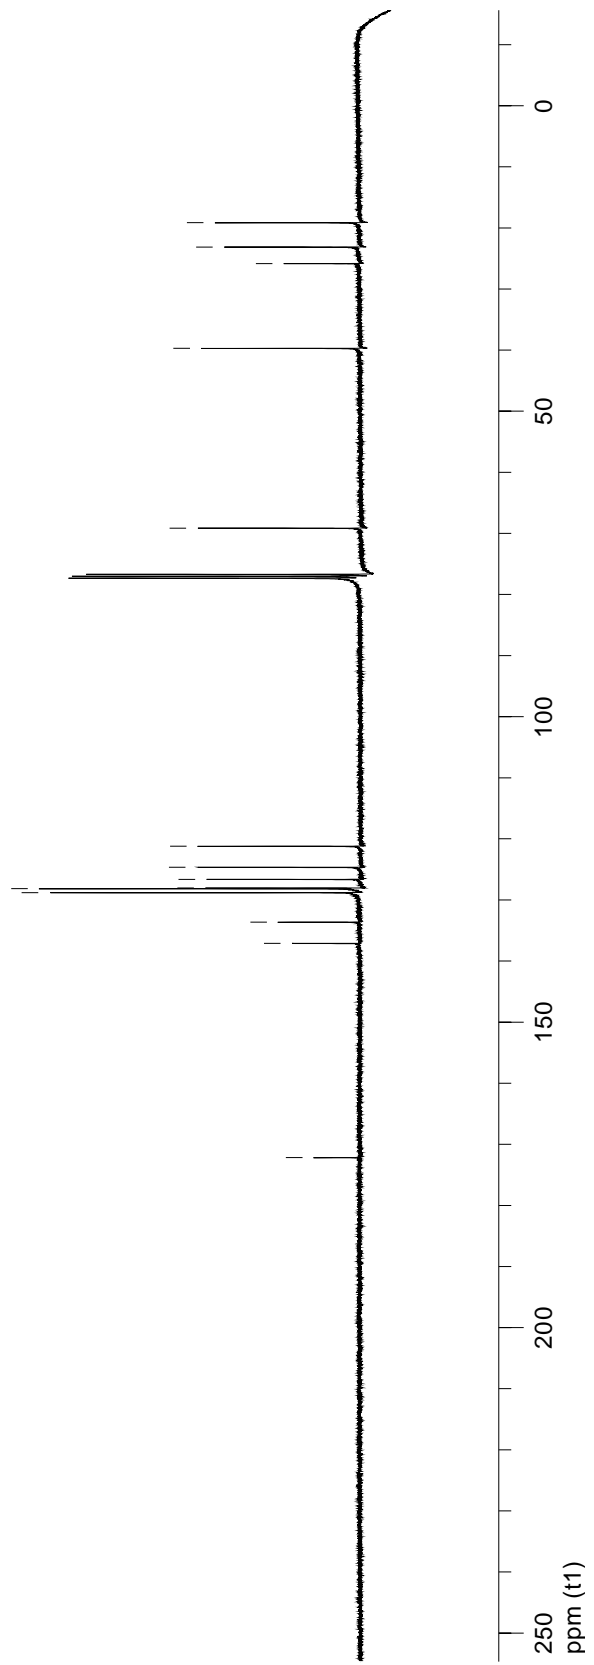

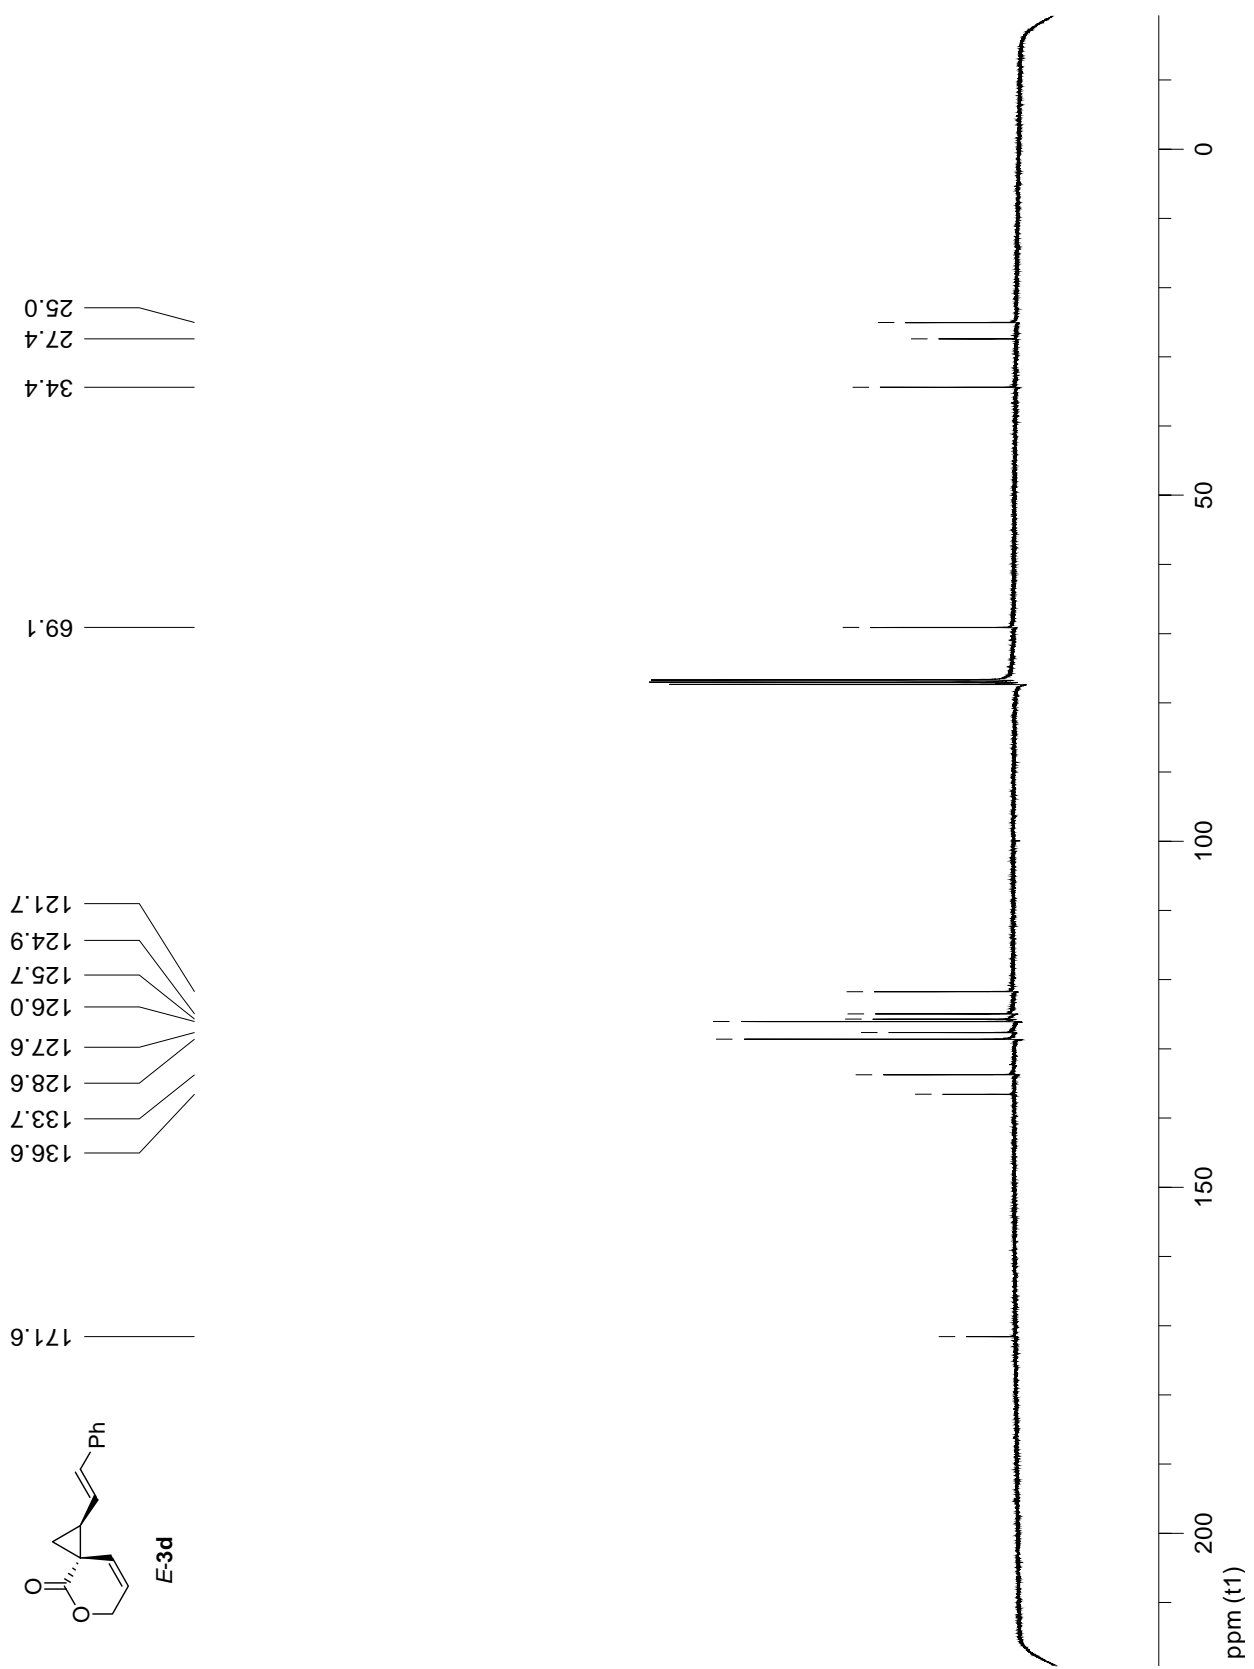

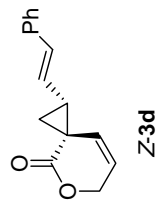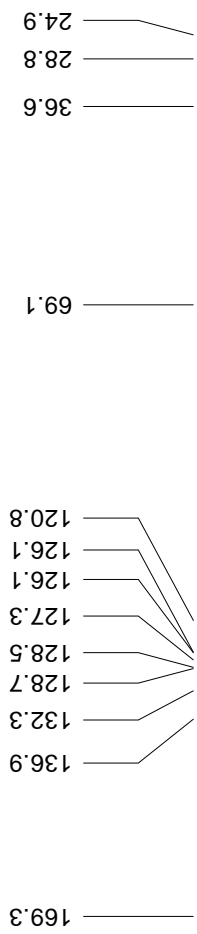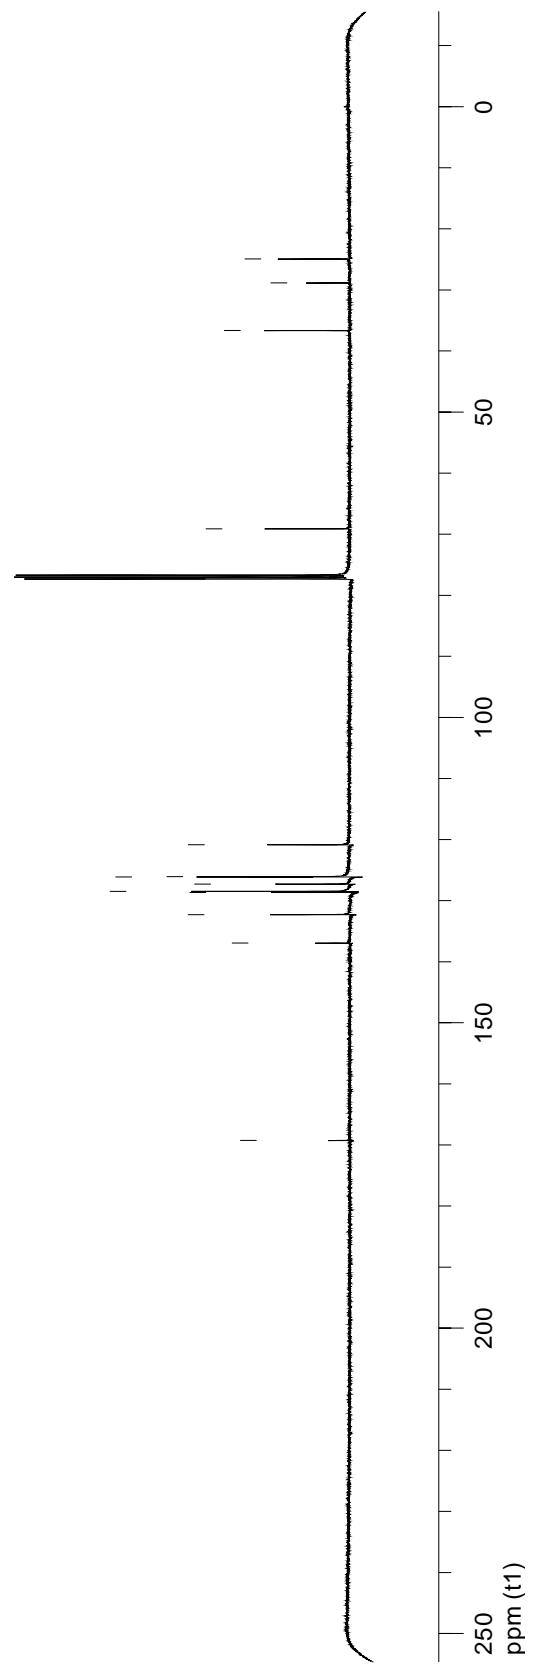



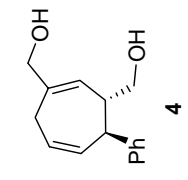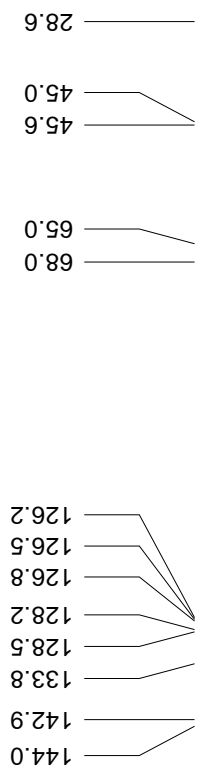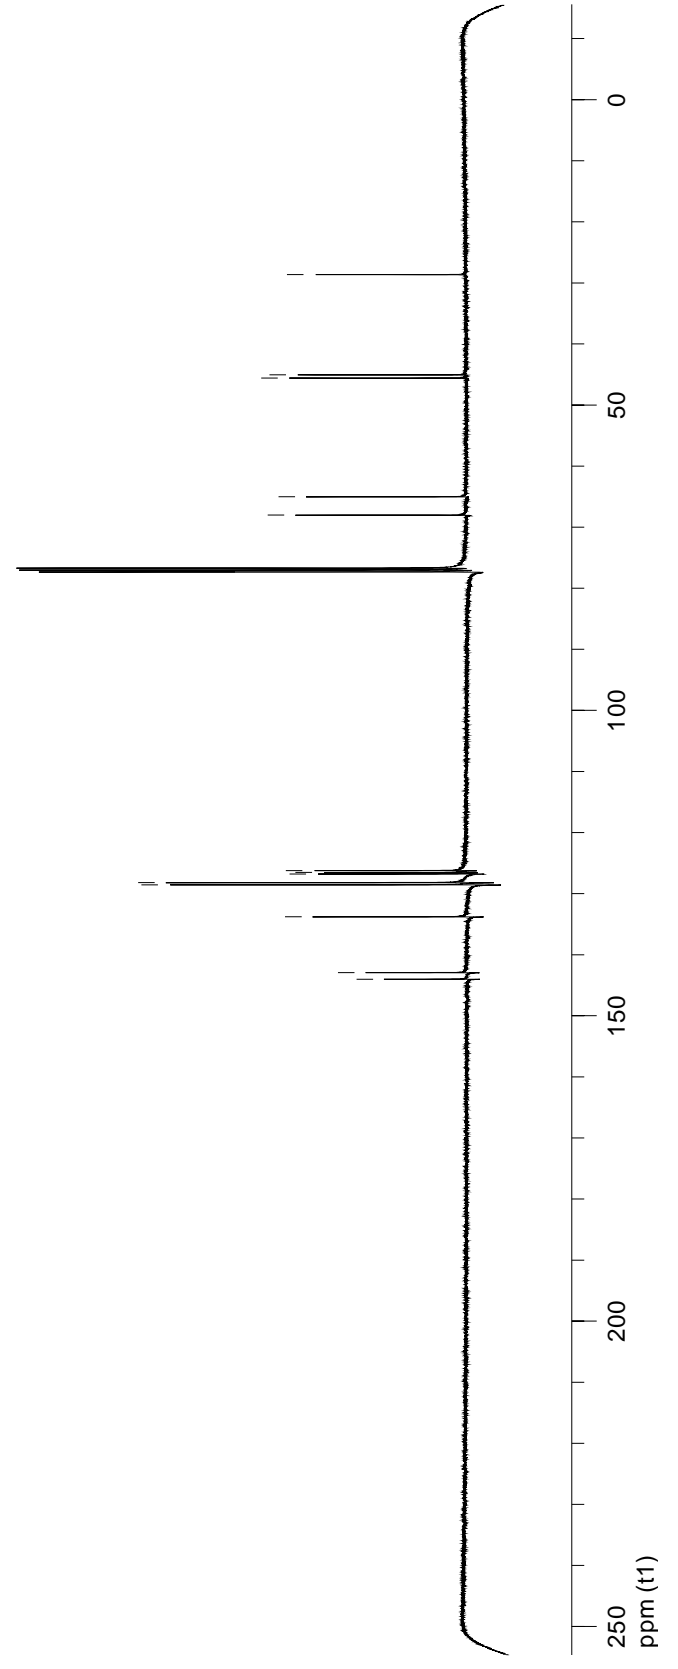

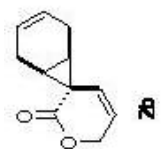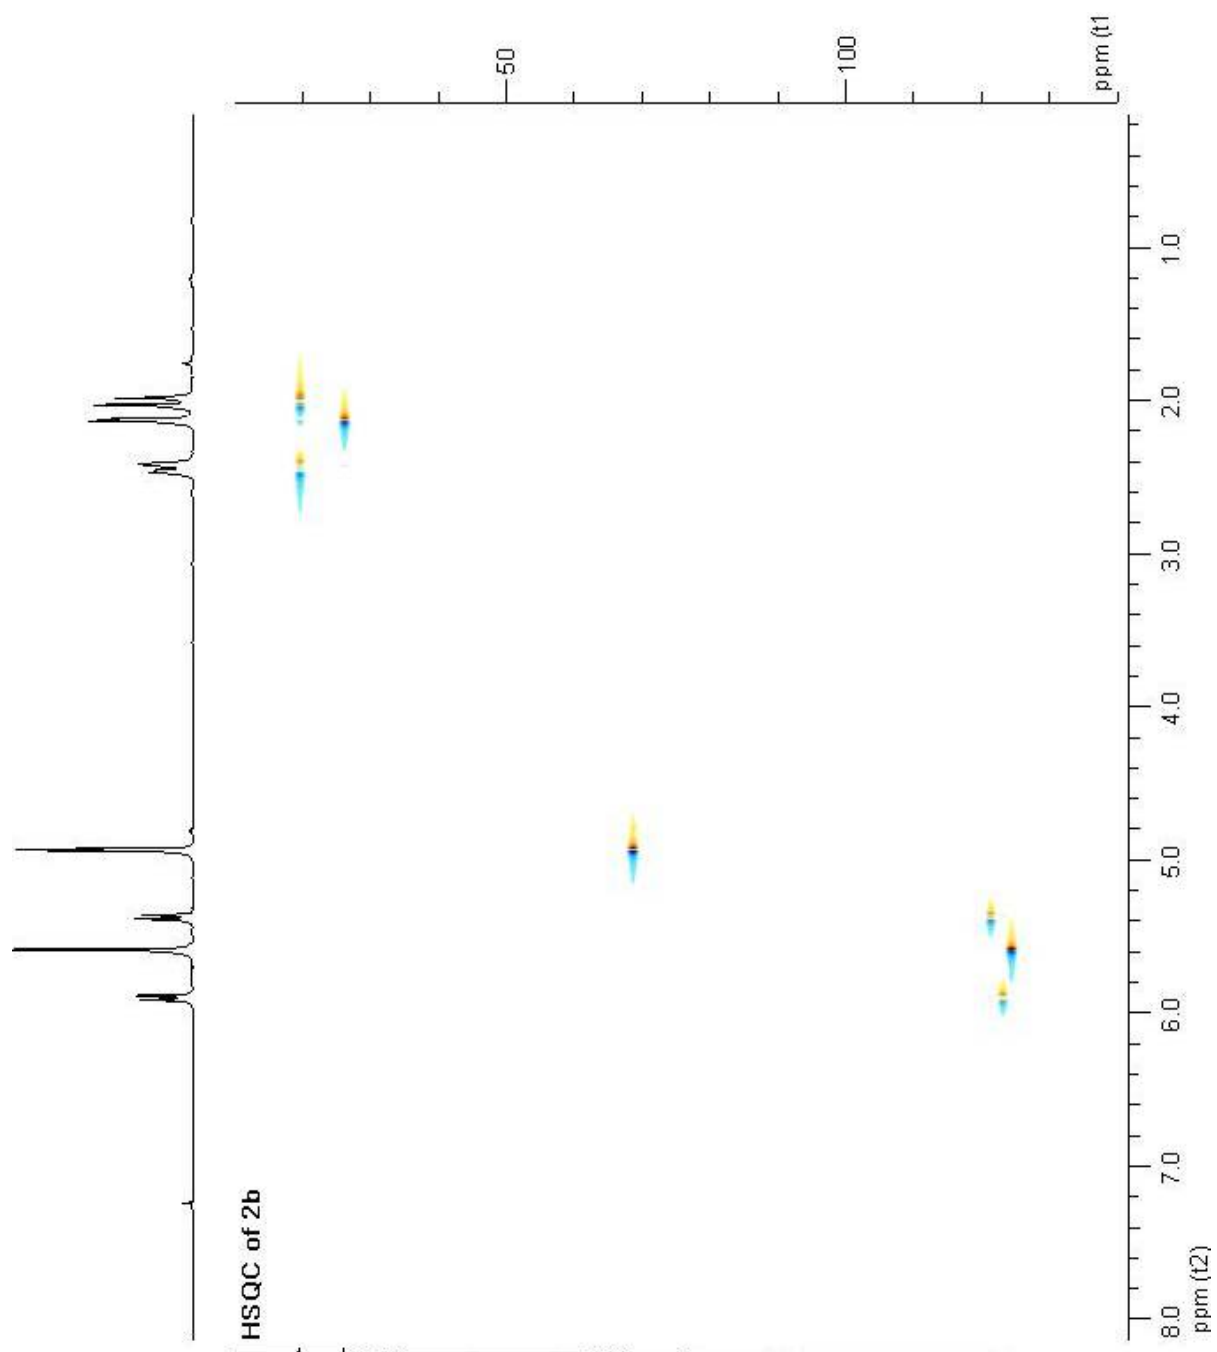

Supplement: NIHMS61641-supplement-si20061105_090.pdf [file NIHMS61641-supplement-si20061105_090.pdf]
